# Supplementary material
Source: PubMed Central journal article supplement (PMC1691875)
Supplement: 15556893s01.pdf [file 15556893s01.pdf]

These are electronic appendices to the paper by Morrow & Fricke 2004 Sexual selection and the risk of extinction in mammals. *Proc. R. Soc. Lond. B* **271**, 2395-2401. (doi:10.1098/rspb.2004.2888)

Electronic appendices are refereed with the text. However, no attempt is made to impose a uniform editorial style on the electronic appendices.

## Electronic Appendix A

Absolute values for comparative data. Body masses were obtained from Silva & Downing (1995), numbers of species per genus were obtained from Wilson & Reeder (1993), and the number of species threatened was taken from the IUCN Red List of Threatened Species™ (IUCN 2002). See main text for full references.

| Genus          | Male body mass (g) | Female body mass (g) | # species in genus | # species threatened |
|----------------|--------------------|----------------------|--------------------|----------------------|
| ACINONYX       | 52750.00           | 44250.00             | 1                  | 1                    |
| ACOMYS         | 29.86              | 33.56                | 14                 | 3                    |
| ACONAEMYS      | 133.00             | 134.00               | 2                  | 0                    |
| ACROBATES      | 14.40              | 14.30                | 1                  | 0                    |
| AEPYCEROS      | 55880.00           | 43660.00             | 1                  | 1                    |
| AEPYPRYMNUS    | 3000.00            | 3500.00              | 1                  | 0                    |
| AETHOMYS       | 50.72              | 47.80                | 10                 | 1                    |
| AILURUS        | 5400.00            | 5400.00              | 1                  | 1                    |
| AKODON         | 35.15              | 31.74                | 45                 | 3                    |
| ALCELAPHUS     | 151500.00          | 120000.00            | 2                  | 2                    |
| ALCES          | 323000.00          | 257500.00            | 1                  | 0                    |
| ALLACTAGA      | 63.50              | 51.50                | 11                 | 4                    |
| ALOUATTA       | 7368.33            | 5273.33              | 8                  | 2                    |
| AMBLYSOMUS     | 46.00              | 43.90                | 4                  | 2                    |
| AMETRIDA       | 8.00               | 12.60                | 1                  | 0                    |
| AMMODORCAS     | 30650.00           | 25450.00             | 1                  | 1                    |
| ANISOMYS       | 508.00             | 512.00               | 1                  | 0                    |
| ANOURA         | 15.34              | 13.48                | 7                  | 2                    |
| ANOURESOREX    | 19.00              | 19.70                | 1                  | 0                    |
| ANTECHINUS     | 60.07              | 37.92                | 10                 | 5                    |
| ANTIDORCAS     | 40950.00           | 37200.00             | 1                  | 1                    |
| ANTILOCAPRA    | 51500.00           | 41000.00             | 1                  | 0                    |
| ANTILOPE       | 38100.00           | 35300.00             | 1                  | 1                    |
| ANTROZOUS      | 20.50              | 28.75                | 2                  | 0                    |
| AONYX          | 12750.00           | 12425.00             | 2                  | 1                    |
| APLODONTIA     | 1130.00            | 1070.00              | 1                  | 1                    |
| APODEMUS       | 23.48              | 21.39                | 21                 | 4                    |
| ARCTOCEPHALUS  | 173000.00          | 57350.00             | 8                  | 3                    |
| ARTIBEUS       | 28.60              | 31.35                | 17                 | 8                    |
| ARVICANTHIS    | 74.00              | 64.50                | 8                  | 0                    |
| ARVICOLA       | 311.00             | 272.00               | 2                  | 1                    |
| ASELLIA        | 25.20              | 22.40                | 2                  | 1                    |
| ATELERIX       | 332.00             | 317.60               | 4                  | 0                    |
| ATHERURUS      | 3430.00            | 3180.00              | 2                  | 0                    |
| ATILAX         | 3400.00            | 3400.00              | 1                  | 0                    |
| AULISCOMYS     | 62.40              | 65.00                | 4                  | 0                    |
| AXIS           | 60166.50           | 46316.50             | 4                  | 2                    |
| BALAENA        | 67200000.00        | 48900000.00          | 1                  | 1                    |
| BALAENOPTERA   | 60700000.00        | 63700000.00          | 5                  | 5                    |
| BALANTIOPTERYX | 3.70               | 5.00                 | 3                  | 2                    |

|                 |            |            |    |    |
|-----------------|------------|------------|----|----|
| BANDICOTA       | 253.50     | 181.00     | 3  | 0  |
| BARBASTELLA     | 8.90       | 10.00      | 2  | 1  |
| BASSARISCUS     | 1320.00    | 939.00     | 2  | 1  |
| BATHYERGUS      | 841.50     | 567.50     | 2  | 1  |
| BDEOGALE        | 1930.00    | 1570.00    | 3  | 1  |
| BEAMYS          | 94.90      | 84.60      | 2  | 2  |
| BERYLMYS        | 377.00     | 345.00     | 4  | 0  |
| BISON           | 730500.00  | 408750.00  | 2  | 2  |
| BLARINA         | 11.80      | 10.90      | 3  | 0  |
| BOS             | 300000.00  | 280000.00  | 4  | 4  |
| BOSELAPHUS      | 270000.00  | 119000.00  | 1  | 1  |
| BRADYPUS        | 4190.00    | 3995.00    | 3  | 1  |
| BURRAMYS        | 44.90      | 41.85      | 1  | 1  |
| CAENOLESTES     | 21.88      | 25.01      | 3  | 0  |
| CALCOCHLORIS    | 27.30      | 20.80      | 1  | 0  |
| CALLITHRIX      | 369.00     | 354.00     | 9  | 4  |
| CALLORHINUS     | 177000.00  | 34500.00   | 1  | 1  |
| CALLOSCIURUS    | 290.00     | 280.00     | 15 | 2  |
| CALOMYS         | 31.00      | 24.87      | 9  | 0  |
| CALOPRYMNUS     | 797.00     | 981.00     | 1  | 1  |
| CALUROMYS       | 259.00     | 228.50     | 3  | 3  |
| CANIS           | 19260.63   | 16173.52   | 7  | 2  |
| CAPRA           | 84666.50   | 49787.50   | 9  | 7  |
| CAPREOLUS       | 46533.00   | 41583.00   | 2  | 0  |
| CAPROMYS        | 754.00     | 660.00     | 1  | 0  |
| CARACAL         | 12500.00   | 9758.00    | 1  | 0  |
| CARDIODERMA     | 26.20      | 23.40      | 1  | 1  |
| CAROLLIA        | 15.51      | 14.20      | 4  | 0  |
| CASINYCTERIS    | 26.00      | 28.50      | 1  | 1  |
| CASTOR          | 19550.00   | 19650.00   | 2  | 1  |
| CAVIA           | 285.00     | 280.00     | 4  | 0  |
| CEBUS           | 3370.00    | 2450.00    | 4  | 1  |
| CEPHALOPHUS     | 22700.00   | 18100.00   | 18 | 16 |
| CEPHALORHYNCHUS | 65300.00   | 72400.00   | 4  | 4  |
| CERATOTHERIUM   | 2140000.00 | 1550000.00 | 1  | 1  |
| CERCARTETUS     | 22.60      | 23.30      | 4  | 0  |
| CERCOCEBUS      | 10200.00   | 5470.00    | 3  | 3  |
| CERCOPITHECUS   | 5916.67    | 3666.67    | 19 | 9  |
| CERVUS          | 166428.57  | 121469.00  | 10 | 6  |
| CHAEREPHON      | 13.89      | 13.91      | 13 | 7  |
| CHALINOLOBUS    | 10.08      | 10.93      | 15 | 11 |
| CHELEMYS        | 74.60      | 72.00      | 2  | 0  |
| CHIONOMYS       | 39.70      | 40.50      | 3  | 3  |
| CHIRODERMA      | 19.68      | 20.40      | 5  | 2  |
| CHIROPODOMYS    | 24.90      | 25.70      | 6  | 2  |
| CHIROPOTES      | 3500.00    | 2500.00    | 2  | 0  |
| CHIRUROMYS      | 47.85      | 45.20      | 3  | 0  |
| CHLOROCEBUS     | 5532.00    | 4082.00    | 1  | 0  |
| CHLOROTALPA     | 58.20      | 46.50      | 5  | 3  |

|                |           |           |     |    |
|----------------|-----------|-----------|-----|----|
| CHOERONISCUS   | 6.70      | 8.07      | 4   | 3  |
| CHOLOEPUS      | 5250.00   | 5070.00   | 2   | 2  |
| CHROEOMYS      | 35.50     | 33.50     | 2   | 0  |
| CHROTOMYS      | 145.00    | 141.00    | 3   | 2  |
| CHROTOPTERUS   | 65.10     | 68.90     | 1   | 0  |
| CHRYSOCYON     | 23800.00  | 22700.00  | 1   | 1  |
| CHRYSOSPALAX   | 262.50    | 268.50    | 2   | 2  |
| CLETHRIONOMYS  | 18.30     | 17.54     | 7   | 2  |
| CLOEOTIS       | 4.20      | 3.90      | 1   | 1  |
| COENDOU        | 4900.00   | 3050.00   | 4   | 0  |
| COLEURA        | 10.20     | 11.10     | 2   | 1  |
| COLOBUS        | 10000.00  | 9670.00   | 4   | 3  |
| COLOMYS        | 51.50     | 57.15     | 1   | 0  |
| CONDYLURA      | 42.00     | 41.00     | 1   | 0  |
| CONEPATUS      | 2130.00   | 1797.50   | 5   | 0  |
| CONNOCHAETES   | 210000.00 | 170500.00 | 2   | 2  |
| CORMURA        | 8.60      | 10.20     | 1   | 0  |
| CRICETOMYS     | 1147.00   | 1121.00   | 2   | 0  |
| CRICETUS       | 316.00    | 211.00    | 1   | 0  |
| CROCIDURA      | 18.40     | 16.14     | 150 | 71 |
| CROCUTA        | 66000.00  | 67037.50  | 1   | 1  |
| CRUNOMYS       | 55.00     | 55.00     | 4   | 2  |
| CRYPTOMYS      | 100.81    | 84.49     | 7   | 2  |
| CRYPTOTIS      | 7.68      | 8.93      | 14  | 3  |
| CTENOMYS       | 302.33    | 250.13    | 38  | 4  |
| CYCLOPES       | 374.00    | 284.00    | 1   | 0  |
| CYNICTIS       | 746.33    | 685.00    | 1   | 0  |
| CYNOMYS        | 875.00    | 776.50    | 5   | 3  |
| CYNOPTERUS     | 202.50    | 220.50    | 5   | 1  |
| CYSTOPHORA     | 400000.00 | 350000.00 | 1   | 0  |
| DACTYLOPSILA   | 499.00    | 340.00    | 4   | 2  |
| DAMA           | 59166.00  | 46633.00  | 2   | 1  |
| DAMALISCUS     | 102000.00 | 91500.00  | 3   | 3  |
| DASYCERCUS     | 112.40    | 87.05     | 3   | 3  |
| DASYKALUTA     | 32.50     | 25.00     | 1   | 0  |
| DASYMYS        | 114.28    | 106.18    | 5   | 5  |
| DASYPROCTA     | 2990.00   | 2945.00   | 11  | 6  |
| DASYPUS        | 6050.00   | 5380.00   | 6   | 2  |
| DASYURUS       | 2531.25   | 1563.75   | 6   | 6  |
| DELPHINAPTERUS | 947000.00 | 661000.00 | 1   | 1  |
| DELPHINUS      | 59533.33  | 45433.33  | 1   | 0  |
| DENDROLAGUS    | 9312.50   | 8212.50   | 9   | 7  |
| DENDROMUS      | 9.47      | 8.39      | 11  | 4  |
| DEOMYS         | 54.10     | 49.50     | 1   | 0  |
| DESMODILLUS    | 53.30     | 51.30     | 1   | 0  |
| DESMODUS       | 30.75     | 33.83     | 1   | 0  |
| DIAEMUS        | 36.40     | 37.50     | 1   | 0  |
| DICEROS        | 852000.00 | 884000.00 | 1   | 1  |
| DICLIDURUS     | 13.97     | 14.93     | 4   | 2  |

|              |            |           |    |    |
|--------------|------------|-----------|----|----|
| DIDELPHIS    | 2058.58    | 1702.92   | 4  | 0  |
| DIPHYLLA     | 25.70      | 25.70     | 1  | 1  |
| DIPODOMYS    | 57.42      | 55.64     | 21 | 8  |
| DISTOECHURUS | 39.10      | 49.10     | 1  | 0  |
| DOBSONIA     | 267.25     | 243.85    | 11 | 7  |
| DORCOPSIS    | 9130.00    | 3580.00   | 4  | 1  |
| DORCOPSULUS  | 1500.00    | 1890.00   | 2  | 1  |
| DREMOMYS     | 185.00     | 173.00    | 5  | 0  |
| ECHYMIPERA   | 1316.67    | 832.83    | 5  | 3  |
| EIDOLON      | 241.00     | 205.30    | 2  | 0  |
| EIRA         | 4320.00    | 3500.00   | 1  | 0  |
| ELEPHANTULUS | 49.80      | 54.85     | 10 | 3  |
| ELIOMYS      | 106.00     | 95.80     | 2  | 2  |
| EMBALLONURA  | 4.80       | 4.85      | 8  | 5  |
| ENHYDRA      | 34500.00   | 19600.00  | 1  | 1  |
| EOTHENOMYS   | 18.30      | 20.30     | 9  | 0  |
| EPOMOPHORUS  | 96.88      | 75.69     | 6  | 2  |
| EPOMOPS      | 114.85     | 91.97     | 3  | 1  |
| EPTESICUS    | 11.47      | 12.74     | 32 | 16 |
| EQUUS        | 271555.56  | 247333.33 | 8  | 5  |
| EREMITALPA   | 29.00      | 23.20     | 1  | 1  |
| ERINACEUS    | 999.67     | 823.67    | 3  | 0  |
| ERYTHROCEBUS | 9740.00    | 4800.00   | 1  | 0  |
| EUMOPS       | 32.22      | 31.87     | 8  | 2  |
| EUNEOMYS     | 89.10      | 68.20     | 4  | 0  |
| FELIS        | 4316.39    | 3138.96   | 5  | 3  |
| FERESA       | 123000.00  | 114000.00 | 1  | 1  |
| FUNAMBULUS   | 90.50      | 95.30     | 5  | 1  |
| GALAGO       | 158.20     | 154.60    | 5  | 5  |
| GALERELLA    | 730.63     | 553.75    | 4  | 0  |
| GAZELLA      | 25500.00   | 16500.00  | 16 | 16 |
| GENETTA      | 1963.25    | 1931.50   | 9  | 3  |
| GEOMYS       | 221.60     | 164.00    | 5  | 4  |
| GEORYCHUS    | 242.50     | 193.50    | 1  | 0  |
| GEOXUS       | 31.30      | 31.70     | 1  | 0  |
| GERBILLURUS  | 34.22      | 31.98     | 4  | 0  |
| GERBILLUS    | 38.28      | 32.18     | 60 | 19 |
| GIRAFFA      | 1190000.00 | 828000.00 | 1  | 1  |
| GLAUCOMYS    | 57.30      | 61.50     | 2  | 0  |
| GLIS         | 215.00     | 170.00    | 1  | 1  |
| GLOSSOPHAGA  | 10.33      | 10.51     | 5  | 1  |
| GORILLA      | 177333.33  | 85000.00  | 2  | 2  |
| GRAMMOMYS    | 30.45      | 30.80     | 11 | 2  |
| GRAPHIURUS   | 42.49      | 39.38     | 14 | 2  |
| HALICHOERUS  | 233000.00  | 155000.00 | 1  | 0  |
| HELIOSCIURUS | 383.00     | 360.00    | 6  | 0  |
| HELOGALE     | 252.33     | 245.00    | 2  | 0  |
| HERPESTES    | 1819.56    | 1450.56   | 10 | 1  |
| HETEROHYRAX  | 2096.67    | 2456.67   | 2  | 2  |

|                |            |            |    |    |
|----------------|------------|------------|----|----|
| HIPPOCAMELUS   | -9000.00   | -9000.00   | 2  | 2  |
| HIPPOPOTAMUS   | 1490000.00 | 1320000.00 | 2  | 2  |
| HIPPOSIDEROS   | 27.85      | 27.39      | 53 | 38 |
| HOMO           | 71900.00   | 57200.00   | 1  | 0  |
| HYAENA         | 39775.00   | 35150.00   | 2  | 2  |
| HYBOMYS        | 51.43      | 51.97      | 6  | 2  |
| HYDROCHAERIS   | 43100.00   | 42200.00   | 1  | 0  |
| HYDROMYS       | 653.30     | 529.33     | 5  | 4  |
| HYDROPOTES     | 12550.00   | 13150.00   | 1  | 1  |
| HYDRURGA       | -9000.00   | -9000.00   | 1  | 0  |
| HYEMOSCHUS     | 9700.00    | 12000.00   | 1  | 0  |
| HYLOBATES      | 7761.67    | 6833.33    | 11 | 6  |
| HYLOMYS        | 56.00      | 64.00      | 3  | 3  |
| HYLOMYSCUS     | 19.10      | 16.70      | 7  | 0  |
| HYPEROODON     | 7500000.00 | 5800000.00 | 2  | 2  |
| HYPOGEOMYS     | 1200.00    | 1170.00    | 1  | 1  |
| HYPSIGNATHUS   | 333.00     | 230.00     | 1  | 0  |
| HYPSIPRYMNODON | 529.00     | 511.00     | 1  | 0  |
| HYSTRIX        | 15330.00   | 15165.00   | 8  | 3  |
| ICHNEUMIA      | 4440.00    | 4315.00    | 1  | 0  |
| ICTONYX        | 955.25     | 584.50     | 2  | 0  |
| IRENOMYS       | 44.40      | 41.90      | 1  | 0  |
| ISOODON        | 1500.00    | 1050.00    | 3  | 1  |
| JACULUS        | 104.25     | 103.75     | 4  | 1  |
| KERIVOULA      | 5.60       | 6.05       | 22 | 9  |
| KOBUS          | 94400.00   | 73900.00   | 5  | 5  |
| LAGENODELPHIS  | 209000.00  | 164000.00  | 1  | 1  |
| LAGORCHESTES   | 1580.00    | 1740.00    | 4  | 4  |
| LAGOSTOMUS     | 5860.00    | 3410.00    | 1  | 0  |
| LAGOTHRIX      | 6700.00    | 5900.00    | 3  | 3  |
| LASIONYCTERIS  | 9.55       | 10.60      | 1  | 0  |
| LASIORHINUS    | 30.10      | 32.50      | 2  | 1  |
| LASIURUS       | 13.06      | 17.94      | 7  | 4  |
| LAVIA          | 20.40      | 25.40      | 1  | 0  |
| LEGGADINA      | 15.10      | 11.50      | 2  | 2  |
| LEMNISCOMYS    | 47.99      | 50.80      | 10 | 5  |
| LEMUR          | -9000.00   | -9000.00   | 1  | 1  |
| LEONTOPITHECUS | 445.00     | 570.00     | 4  | 4  |
| LEOPARDUS      | 13000.00   | 10800.00   | 3  | 1  |
| LEOPOLDAMYS    | 366.75     | 298.00     | 4  | 2  |
| LEPTAILURUS    | 10535.00   | 10642.50   | 1  | 0  |
| LEPTOMYS       | 90.00      | 90.00      | 3  | 2  |
| LEPTONYCHOTES  | 363000.00  | 376666.67  | 1  | 0  |
| LEPTONYCTERIS  | 24.40      | 23.50      | 2  | 2  |
| LEPUS          | 2239.88    | 2457.13    | 30 | 7  |
| LIMNOGALE      | 75.80      | 79.50      | 1  | 1  |
| LIONYCTERIS    | 8.70       | 8.90       | 1  | 0  |
| LOBODON        | 220000.00  | 242000.00  | 1  | 0  |
| LONCHOPHYLLA   | 10.38      | 9.13       | 7  | 4  |

|                 |            |            |    |    |
|-----------------|------------|------------|----|----|
| LONCHORHINA     | 11.45      | 12.05      | 4  | 4  |
| LONTRA          | 8675.00    | 5280.00    | 4  | 2  |
| LOPHOCEBUS      | 8980.00    | 6400.00    | 1  | 1  |
| LOPHUROMYS      | 80.60      | 72.25      | 9  | 4  |
| LORENTZIMYS     | 14.30      | 14.10      | 1  | 0  |
| LOXODONTA       | 2613333.33 | 2510000.00 | 1  | 1  |
| LUTRA           | 9600.00    | 6750.00    | 3  | 3  |
| LYCAON          | 21800.00   | 22300.00   | 1  | 1  |
| LYNX            | 13060.13   | 10879.00   | 4  | 2  |
| MACACA          | 8692.08    | 6003.94    | 17 | 17 |
| MACROGALIDIA    | 6100.00    | 4200.00    | 1  | 0  |
| MACROGLOSSUS    | 16.80      | 18.10      | 2  | 0  |
| MACROPHYLLUM    | 7.10       | 7.20       | 1  | 0  |
| MACROPUS        | 30096.08   | 15663.58   | 14 | 4  |
| MACROSCELIDES   | 38.00      | 38.40      | 1  | 1  |
| MACROTIS        | 1098.75    | 569.00     | 2  | 2  |
| MACROTUS        | 11.10      | 10.80      | 2  | 1  |
| MALACOMYS       | 73.05      | 69.10      | 5  | 2  |
| MALACOTHRIX     | 16.40      | 10.40      | 1  | 0  |
| MALLOMYS        | 1090.00    | 1230.00    | 4  | 2  |
| MANDRILLUS      | 25000.00   | 11500.00   | 2  | 2  |
| MANIS           | 7896.67    | 5756.67    | 7  | 4  |
| MARGARETAMYS    | 79.30      | 69.67      | 3  | 2  |
| MARMOSA         | 66.00      | 58.60      | 9  | 5  |
| MARMOTA         | 3850.00    | 3710.00    | 14 | 4  |
| MARTES          | 2305.00    | 1291.00    | 8  | 1  |
| MASTOMYS        | 48.74      | 43.08      | 8  | 2  |
| MAXOMYS         | 124.70     | 125.93     | 17 | 7  |
| MEGALOGLOSSUS   | 15.40      | 15.20      | 1  | 0  |
| MELASMOTHRIX    | 50.80      | 44.10      | 1  | 1  |
| MELES           | 10120.00   | 8330.00    | 1  | 0  |
| MELLIVORA       | 8840.00    | 6025.00    | 1  | 0  |
| MELOMYS         | 97.73      | 87.76      | 21 | 6  |
| MEPHITIS        | 1433.00    | 1223.50    | 2  | 0  |
| MERIONES        | 83.10      | 70.00      | 16 | 5  |
| MESEMBRIOMYS    | 677.00     | 579.00     | 2  | 2  |
| MESOPHYLLA      | 6.40       | 6.60       | 1  | 0  |
| METACHIRUS      | 282.00     | 236.00     | 1  | 0  |
| MICOUREUS       | 110.00     | 99.10      | 4  | 2  |
| MICRODIPODOPS   | 10.20      | 10.70      | 2  | 0  |
| MICRONYCTERIS   | 8.10       | 8.64       | 10 | 6  |
| MICROPERORYCTES | 478.00     | 598.00     | 3  | 0  |
| MICROPOTAMOGALE | 102.00     | 95.50      | 2  | 2  |
| MICROTUS        | 62.38      | 52.97      | 60 | 16 |
| MILLARDIA       | 56.80      | 52.50      | 4  | 1  |
| MIMON           | 13.70      | 14.25      | 2  | 0  |
| MINIOPTERUS     | 11.40      | 11.45      | 10 | 8  |
| MIOPITHECUS     | 1380.00    | 1120.00    | 1  | 0  |
| MIROUNGA        | 3173333.33 | 625333.33  | 2  | 0  |

|              |            |           |    |    |
|--------------|------------|-----------|----|----|
| MOLOSSOPS    | 10.55      | 9.43      | 7  | 4  |
| MOLOSSUS     | 19.31      | 16.21     | 5  | 2  |
| MONODELPHIS  | 91.25      | 55.00     | 15 | 12 |
| MONOPHYLLUS  | 15.30      | 13.00     | 2  | 1  |
| MOPS         | 43.75      | 41.75     | 14 | 6  |
| MORMOOPS     | 16.68      | 15.45     | 2  | 1  |
| MORMOPTERUS  | 13.40      | 16.00     | 11 | 6  |
| MOSIA        | 3.10       | 3.40      | 1  | 0  |
| MUNGOS       | 1131.33    | 1242.00   | 2  | 1  |
| MUNTIACUS    | 18400.00   | 13600.00  | 6  | 3  |
| MUREXIA      | 211.00     | 68.00     | 2  | 1  |
| MUS          | 12.23      | 12.09     | 38 | 8  |
| MUSTELA      | 651.51     | 368.55    | 16 | 6  |
| MYOCASTOR    | 7597.50    | 6050.00   | 1  | 0  |
| MYOMYS       | 36.35      | 33.40     | 7  | 0  |
| MYONYCTERIS  | 46.45      | 40.65     | 3  | 2  |
| MYOPROCTA    | 1200.00    | 1360.00   | 2  | 1  |
| MYOSOREX     | 12.13      | 11.98     | 12 | 0  |
| MYOTIS       | 8.54       | 8.87      | 84 | 53 |
| MYRMECOBIUS  | 495.00     | 416.00    | 1  | 1  |
| MYSTACINA    | 12.30      | 11.60     | 2  | 2  |
| MYSTROMYS    | 95.70      | 78.00     | 1  | 1  |
| NANDINIA     | 1990.00    | 1900.00   | 1  | 0  |
| NANONYCTERIS | 19.70      | 23.00     | 1  | 0  |
| NAPAEOZAPUS  | 21.50      | 23.40     | 1  | 0  |
| NASALIS      | 18825.00   | 9992.50   | 2  | 1  |
| NASUA        | 4275.00    | 3450.00   | 2  | 1  |
| NATALUS      | 6.78       | 5.88      | 5  | 2  |
| NECTOMYS     | 176.00     | 205.50    | 3  | 1  |
| NEOFELIS     | 12000.00   | 9450.00   | 1  | 1  |
| NEOHYDROMYS  | 19.50      | 18.00     | 1  | 1  |
| NEOMYS       | 73.60      | 76.00     | 3  | 0  |
| NEOPHOCA     | 300000.00  | 80000.00  | 1  | 0  |
| NEOTOMA      | 253.63     | 199.33    | 20 | 8  |
| NEOTRAGUS    | 5000.00    | 5400.00   | 3  | 3  |
| NIVIVENTER   | 72.80      | 69.80     | 15 | 3  |
| NOCTILIO     | 46.35      | 37.56     | 2  | 0  |
| NYCTALUS     | 35.10      | 43.40     | 6  | 5  |
| NYCTERIS     | 10.59      | 12.03     | 12 | 6  |
| NYCTICEBUS   | 920.00     | 900.00    | 2  | 1  |
| NYCTICEIUS   | 5.98       | 7.60      | 6  | 0  |
| NYCTIMENE    | 56.15      | 62.15     | 15 | 10 |
| NYCTINOMOPS  | 12.20      | 11.75     | 4  | 0  |
| NYCTOPHILUS  | 6.37       | 6.92      | 8  | 5  |
| OCHOTONA     | 174.83     | 155.17    | 25 | 8  |
| OCHROTOMYS   | 22.55      | 22.20     | 1  | 0  |
| ODOBENUS     | 1270000.00 | 850000.00 | 1  | 0  |
| ODOCOILEUS   | 66008.00   | 49739.25  | 2  | 0  |
| OENOMYS      | 94.00      | 82.00     | 2  | 1  |



|                 |            |           |    |    |
|-----------------|------------|-----------|----|----|
| ONDATRA         | 1045.60    | 1028.80   | 1  | 0  |
| ONYCHOGALEA     | 6500.00    | 5150.00   | 3  | 2  |
| ONYCHOMYS       | 31.35      | 24.50     | 3  | 0  |
| ORCINUS         | 2730000.00 | 909000.00 | 1  | 1  |
| OREAMNOS        | 75000.00   | 70000.00  | 1  | 0  |
| OREOTRAGUS      | 11243.00   | 12966.00  | 1  | 1  |
| ORNITHORHYNCHUS | 1736.67    | 1267.67   | 1  | 0  |
| ORYCTEROPUS     | 53700.00   | 48850.00  | 1  | 0  |
| ORYCTOLAGUS     | 1515.00    | 1540.00   | 1  | 0  |
| ORYX            | 155015.00  | 141350.00 | 3  | 3  |
| ORYZOMYS        | 80.08      | 73.54     | 36 | 7  |
| OTARIA          | 300000.00  | 160000.00 | 1  | 0  |
| OTOCYON         | 4122.50    | 4247.50   | 1  | 0  |
| OTOLEMUR        | 1245.00    | 935.00    | 2  | 0  |
| OTOMYS          | 139.61     | 119.75    | 12 | 6  |
| OUREBIA         | 13200.00   | 15100.00  | 1  | 1  |
| OVIS            | 86625.00   | 52666.67  | 6  | 4  |
| OXYMYCTERUS     | 55.15      | 65.00     | 12 | 2  |
| PAN             | 49450.00   | 40300.00  | 2  | 2  |
| PANTHERA        | 150127.78  | 100450.00 | 4  | 3  |
| PANTHOLOPS      | 45500.00   | 27500.00  | 1  | 1  |
| PAPIO           | 24516.67   | 13336.11  | 2  | 2  |
| PAPPOGEOMYS     | 261.50     | 242.00    | 9  | 5  |
| PARACYNICTIS    | 1640.00    | 1640.00   | 1  | 0  |
| PARAHYAENA      | 40583.33   | 38250.00  | 1  | 1  |
| PARALEPTOMYS    | 54.00      | 58.00     | 2  | 1  |
| PARANTECHINUS   | 54.00      | 40.25     | 2  | 0  |
| PARANYCTIMENE   | 24.50      | 25.70     | 1  | 1  |
| PARAXERUS       | 195.00     | 230.00    | 11 | 5  |
| PAROTOMYS       | 138.00     | 121.00    | 2  | 0  |
| PEDETES         | 2968.33    | 3050.00   | 1  | 1  |
| PELOMYS         | 142.00     | 118.00    | 5  | 2  |
| PERAMELES       | -9000.00   | -9000.00  | 4  | 3  |
| PEROMYSCUS      | 22.74      | 22.44     | 53 | 19 |
| PEROPTERYX      | 7.98       | 8.50      | 3  | 0  |
| PERORYCTES      | 865.00     | 812.00    | 2  | 0  |
| PETAURISTA      | 1260.00    | 1330.00   | 8  | 2  |
| PETAURUS        | 345.23     | 290.64    | 5  | 4  |
| PETRODROMUS     | 184.00     | 200.00    | 1  | 0  |
| PETROMUS        | 191.00     | 257.00    | 1  | 0  |
| PHACOCHOERUS    | 59475.00   | 45375.00  | 2  | 0  |
| PHALANGER       | 2103.33    | 2126.67   | 9  | 5  |
| PHASCOGALE      | 129.50     | 94.00     | 2  | 2  |
| PHASCOLARCTOS   | 7483.33    | 5683.33   | 1  | 0  |
| PHOCA           | 104708.33  | 90366.67  | 7  | 2  |
| PHOCOENA        | 47350.00   | 48500.00  | 3  | 3  |
| PHYLLOSTOMUS    | 55.58      | 51.58     | 4  | 1  |
| PHYLLOTIS       | 53.75      | 39.75     | 13 | 1  |
| PIPISTRELLUS    | 4.44       | 4.86      | 62 | 24 |

|                 |          |          |    |    |
|-----------------|----------|----------|----|----|
| PITHECHEIR      | 102.00   | 104.00   | 2  | 1  |
| PITHECIA        | 1930.00  | 1510.00  | 5  | 0  |
| PLANIGALE       | 8.63     | 6.63     | 5  | 1  |
| PLATYRRHINUS    | 23.33    | 24.87    | 10 | 5  |
| PLECOTUS        | 8.00     | 8.46     | 7  | 4  |
| POECILOGALE     | 263.00   | 173.00   | 1  | 0  |
| POGONOMELOMYS   | 33.40    | 26.00    | 3  | 1  |
| POGONOMYS       | 61.93    | 60.50    | 4  | 1  |
| PONGO           | 74700.00 | 38500.00 | 2  | 2  |
| POTAMOCHOERUS   | 61700.00 | 59300.00 | 2  | 0  |
| POTOROUS        | 1557.50  | 1297.50  | 3  | 3  |
| POTOS           | 1620.00  | 1650.00  | 1  | 0  |
| PRAOMYS         | 44.85    | 37.73    | 9  | 9  |
| PRIONAILURUS    | 3300.00  | 2500.00  | 4  | 3  |
| PROCAPRA        | 31500.00 | 24000.00 | 3  | 3  |
| PROCAVIA        | 3325.00  | 3063.75  | 1  | 0  |
| PROCOLOBUS      | 11000.00 | 7000.00  | 6  | 6  |
| PROCYON         | 8069.00  | 6389.00  | 7  | 5  |
| PROMOPS         | 14.40    | 15.80    | 2  | 0  |
| PRONOLAGUS      | 1756.67  | 2186.67  | 3  | 0  |
| PROTELES        | 8294.00  | 8806.00  | 1  | 0  |
| PROTOXERUS      | 506.00   | 737.00   | 2  | 0  |
| PSAMMOMYS       | 92.10    | 69.10    | 2  | 0  |
| PSEUDOCHEIRUS   | 1251.00  | 1123.00  | 7  | 1  |
| PSEUDOCHIOPS    | 512.00   | 507.50   | 4  | 3  |
| PSEUDOHYDROMYS  | 16.20    | 17.40    | 2  | 2  |
| PTERONOTUS      | 34.29    | 33.06    | 6  | 2  |
| PTEROPUS        | 995.00   | 831.67   | 57 | 36 |
| PUMA            | 71750.00 | 42900.00 | 1  | 1  |
| RAPHICERUS      | 9266.67  | 9911.67  | 3  | 0  |
| RATTUS          | 169.03   | 155.08   | 56 | 27 |
| RATUFA          | 1295.00  | 1280.00  | 4  | 2  |
| REDUNCA         | 40425.00 | 36125.00 | 3  | 3  |
| REITHRODONTOMYS | 10.35    | 9.82     | 20 | 7  |
| RHABDOMYS       | 43.10    | 42.54    | 1  | 1  |
| RHINOLOPHUS     | 11.52    | 12.00    | 64 | 38 |
| RHINOPHYLLA     | 9.40     | 10.40    | 3  | 2  |
| RHINOPOMA       | 16.50    | 15.80    | 3  | 1  |
| RHOGEESSA       | 3.50     | 3.90     | 7  | 6  |
| RHYNCHOGALE     | 2310.00  | 3070.00  | 1  | 0  |
| RHYNCHONYCTERIS | 3.75     | 2.60     | 1  | 0  |
| ROUSETTUS       | 91.10    | 85.44    | 9  | 4  |
| RUPICAPRA       | 40000.00 | 33500.00 | 2  | 1  |
| SACCOPTERYX     | 5.01     | 5.57     | 4  | 1  |
| SACOSTOMUS      | 48.92    | 45.48    | 2  | 0  |
| SAGUINUS        | 415.21   | 393.17   | 12 | 3  |
| SAIGA           | 41750.00 | 31150.00 | 1  | 1  |
| SAIMIRI         | 716.50   | 645.00   | 5  | 2  |
| SARCOPHILUS     | 8000.00  | 6000.00  | 1  | 0  |

|                 |           |           |    |    |
|-----------------|-----------|-----------|----|----|
| SCALOPUS        | 95.05     | 79.15     | 1  | 0  |
| SCIURUS         | 538.75    | 431.00    | 28 | 5  |
| SCOTONYCTERIS   | 43.70     | 44.58     | 2  | 1  |
| SCOTOPHILUS     | 23.25     | 24.80     | 10 | 4  |
| SEMNOPITHECUS   | 19000.00  | 11175.00  | 1  | 1  |
| SETONIX         | 3600.00   | 2900.00   | 1  | 0  |
| SIGMOCEROS      | 177000.00 | 166000.00 | 1  | 0  |
| SIGMODON        | 100.00    | 86.64     | 10 | 0  |
| SMINTHOPSIS     | 19.20     | 17.46     | 20 | 8  |
| SOREX           | 5.92      | 5.32      | 70 | 16 |
| SORICULUS       | 6.72      | 6.74      | 10 | 1  |
| SOTALIA         | 54000.00  | 55000.00  | 1  | 1  |
| SPALACOPUS      | 65.00     | 190.00    | 1  | 0  |
| SPERMOPHILUS    | 324.50    | 284.83    | 38 | 9  |
| SPHAERIAS       | 26.00     | 30.00     | 1  | 0  |
| SPHAERONYCTERIS | 14.90     | 14.70     | 1  | 0  |
| SPILOCUSCUS     | 5035.00   | 4780.00   | 2  | 2  |
| STEATOMYS       | 22.13     | 25.53     | 6  | 2  |
| STENELLA        | 69366.67  | 65800.00  | 5  | 5  |
| STOCHOMYS       | 87.00     | 81.00     | 1  | 0  |
| STRIGOCUSCUS    | 3000.00   | 2410.00   | 2  | 0  |
| STURNIRA        | 25.40     | 25.41     | 12 | 6  |
| SUNCUS          | 28.24     | 18.88     | 16 | 9  |
| SUNDAMYS        | 300.00    | 334.00    | 3  | 1  |
| SUNDASCIURUS    | 93.50     | 77.70     | 15 | 7  |
| SURICATA        | 759.50    | 730.00    | 1  | 0  |
| SUS             | 96470.00  | 64580.00  | 10 | 5  |
| SYCONYCTERIS    | 17.10     | 17.60     | 3  | 2  |
| SYLVICAPRA      | 17900.00  | 19650.00  | 1  | 0  |
| SYLVILAGUS      | 1289.70   | 1205.30   | 13 | 6  |
| SYNAPTOMYS      | 30.85     | 33.00     | 2  | 0  |
| TACHYGLOSSUS    | 2875.00   | 3600.00   | 1  | 0  |
| TADARIDA        | 20.47     | 20.52     | 8  | 6  |
| TALPA           | 92.73     | 76.63     | 9  | 1  |
| TAMANDUA        | 6000.00   | 5030.00   | 2  | 0  |
| TAMIAS          | 64.80     | 75.92     | 25 | 2  |
| TAMIASCIURUS    | 204.00    | 199.00    | 3  | 0  |
| TAMIOPS         | 56.35     | 63.15     | 4  | 0  |
| TAPHOZOUS       | 27.10     | 25.53     | 13 | 6  |
| TARSIPES        | 8.50      | 10.00     | 1  | 0  |
| TARSIVUS        | 95.50     | 104.00    | 5  | 2  |
| TATERA          | 110.27    | 102.22    | 12 | 0  |
| TAXIDEA         | 7380.00   | 7000.00   | 1  | 0  |
| TAYASSU         | 20300.00  | 21900.00  | 1  | 0  |
| THALLOMYS       | 79.23     | 75.90     | 4  | 1  |
| THEROPITHECUS   | 20500.00  | 13600.00  | 1  | 1  |
| THOMOMYS        | 123.74    | 104.30    | 9  | 2  |
| THRYONOMYS      | 3174.00   | 2534.00   | 2  | 0  |
| THYLOGALE       | 5920.83   | 4000.00   | 4  | 3  |

|                |            |            |    |   |
|----------------|------------|------------|----|---|
| THYROPTERA     | 4.70       | 4.50       | 2  | 1 |
| TONATIA        | 22.43      | 19.53      | 6  | 3 |
| TRACHOPS       | 36.30      | 36.50      | 1  | 0 |
| TRACHYPITHECUS | 7300.00    | 6396.67    | 9  | 8 |
| TRAGELAPHUS    | 195925.00  | 124750.00  | 7  | 7 |
| TRICHECHUS     | 48100.00   | 19930.00   | 3  | 3 |
| TRICHOSURUS    | 2425.00    | 1900.00    | 3  | 0 |
| TUPAIA         | 109.70     | 130.30     | 14 | 4 |
| TURSIOPS       | 188000.00  | 117000.00  | 1  | 1 |
| URANOMYS       | 37.00      | 30.00      | 1  | 0 |
| UROCYON        | 4035.00    | 3632.50    | 2  | 1 |
| URODERMA       | 16.00      | 17.50      | 2  | 0 |
| UROMYS         | 724.50     | 496.75     | 7  | 5 |
| URSUS          | 230300.00  | 133000.00  | 4  | 2 |
| VAMPYRESSA     | 9.60       | 10.80      | 5  | 3 |
| VAMPYRODES     | 26.90      | 30.00      | 1  | 0 |
| VAMPYRUM       | 164.75     | 184.00     | 1  | 1 |
| VIVERRA        | 11900.00   | 11133.33   | 4  | 1 |
| VOLEMYS        | 47.70      | 45.40      | 4  | 2 |
| VULPES         | 4064.13    | 3578.33    | 10 | 6 |
| WALLABIA       | 17000.00   | 13000.00   | 1  | 0 |
| XERUS          | 574.00     | 588.00     | 4  | 0 |
| ZAGLOSSUS      | 7000.00    | 8600.00    | 1  | 1 |
| ZAPUS          | 21.05      | 26.10      | 3  | 1 |
| ZELOTOMYS      | 53.70      | 54.50      | 2  | 0 |
| ZIPHIUS        | 5600000.00 | 6500000.00 | 1  | 0 |
| ZYZOMYS        | 65.85      | 64.40      | 5  | 2 |

## Electronic Appendix B

Absolute values of male body mass and testes mass together with source references. IUCN categories and population trend data were obtained from the IUCN Red List of Threatened Species™ (IUCN 2002). - = Not threatened; LR = Lower risk; VU = Vulnerable; EN = Endangered; CR = Critically endangered; EX = Extinct; DD = Data deficient (IUCN 1994). Population trend data, where known, was either Down or Stable.

| Species                            | Body mass (g) | Testes mass (mg) | Reference           | IUCN category | Population Trend |
|------------------------------------|---------------|------------------|---------------------|---------------|------------------|
| <i>Acomys cahirinus</i>            | 27            | 224              | Breed & Taylor 2000 | -             |                  |
| <i>Acrobates pygmaeus</i>          | 12.3          | 180              | Rose et al 1997     | -             |                  |
| <i>Aepyceros melampus</i>          | 62500         | 120000           | Gage et al 2002     | LR            | Stable           |
| <i>Aethomys chrysophilus</i>       | 85            | 862              | Breed & Taylor 2000 | -             |                  |
| <i>Aethomys hindei</i>             | 143           | 2768             | Breed & Taylor 2000 | -             |                  |
| <i>Aethomys namaquensis</i>        | 72            | 1476             | Breed & Taylor 2000 | -             |                  |
| <i>Alcelaphus buselaphus</i>       | 132000        | 107000           | Gage et al 2002     | LR            | Down             |
| <i>Alces alces</i>                 | 789000        | 106000           | Gage et al 2002     | -             |                  |
| <i>Allenopithecus nigroviridis</i> | 5000          | 16960            | Harcourt et al 1995 | LR            | Down             |
| <i>Alouatta palliata</i>           | 7260          | 23000            | Harcourt et al 1995 | -             |                  |
| <i>Anisomys imitator</i>           | 508           | 4167             | Breed & Taylor 2000 | -             |                  |
| <i>Anoura cultrata</i>             | 17.1          | 50               | Hosken et al 2001   | -             |                  |
| <i>Anoura geoffroyi</i>            | 14.72         | 90               | Hosken et al 2001   | -             |                  |
| <i>Antechinus flavipes</i>         | 74            | 700              | Rose et al 1997     | -             |                  |
| <i>Antechinus stuartii</i>         | 39            | 350              | Gage et al 2002     | -             |                  |
| <i>Antechinus swainsonii</i>       | 145           | 200              | Rose et al 1997     | -             |                  |
| <i>Antrozous pallidus</i>          | 23            | 181.2            | Gage et al 2002     | -             |                  |
| <i>Aotus trivirgatus</i>           | 1020          | 1200             | Harcourt et al 1995 | -             |                  |
| <i>Apodemus agrarius</i>           | 21.8          | 994              | Gage et al 2002     | -             |                  |
| <i>Apodemus argenteus</i>          | 21            | 651              | Breed & Taylor 2000 | -             |                  |
| <i>Apodemus flavicollis</i>        | 29            | 891              | Gage et al 2002     | -             |                  |
| <i>Apodemus semotus</i>            | 28            | 1378             | Breed & Taylor 2000 | LR            | ?                |
| <i>Apodemus speciosus</i>          | 46            | 1233             | Breed & Taylor 2000 | -             |                  |
| <i>Apodemus sylvaticus</i>         | 23.1          | 788              | Gage et al 2002     | -             |                  |
| <i>Ardops nichollsi</i>            | 16.9          | 50               | Hosken et al 2001   | LR            | -                |
| <i>Artibeus jamaicensis</i>        | 43.48         | 30               | Hosken et al 2001   | -             |                  |
| <i>Artibeus phaeotis</i>           | 10.5          | 30               | Hosken et al 2001   | -             |                  |
| <i>Ateles geoffroyi</i>            | 7940          | 13400            | Harcourt et al 1995 | -             |                  |
| <i>Avahi laniger</i>               | 1300          | 2090             | Harcourt et al 1995 | LR            | ?                |
| <i>Bandicota bengalensis</i>       | 289           | 2121             | Breed & Taylor 2000 | -             |                  |
| <i>Bandicota indica</i>            | 613           | 2035             | Breed & Taylor 2000 | -             |                  |
| <i>Bandicota savilei</i>           | 274           | 1263             | Breed & Taylor 2000 | -             |                  |
| <i>Batomys salomonseni</i>         | 194           | 1556             | Breed & Taylor 2000 | -             |                  |
| <i>Berymys bowersi</i>             | 431           | 14431            | Breed & Taylor 2000 | -             |                  |
| <i>Bettongia gaimardi</i>          | 1683.3        | 5740             | Rose et al 1997     | LR            | -                |
| <i>Bos taurus</i>                  | 630400        | 681000           | Gage et al 2002     | -             |                  |
| <i>Bullimus bagobus</i>            | 380           | 4080             | Breed & Taylor 2000 | -             |                  |
| <i>Bunomys chrysocomus</i>         | 117           | 3523             | Breed & Taylor 2000 | -             |                  |
| <i>Bunomys fratrorum</i>           | 137           | 407              | Breed & Taylor 2000 | LR            | ?                |

|                                |         |         |                     |    |      |
|--------------------------------|---------|---------|---------------------|----|------|
| <i>Cacajao calvus</i>          | 3450    | 5800    | Harcourt et al 1995 | VU | ?    |
| <i>Callithrix argentata</i>    | 360     | 1830    | Harcourt et al 1995 | -  |      |
| <i>Callithrix jacchus</i>      | 320     | 1300    | Gage et al 2002     | -  |      |
| <i>Callithrix pygmaea</i>      | 130     | 330     | Harcourt et al 1995 | -  |      |
| <i>Callorhinus ursinus</i>     | 29000   | 63600   | Gage et al 2002     | VU | ?    |
| <i>Cardioderma cor</i>         | 28.97   | 40      | Hosken et al 2001   | LR | -    |
| <i>Carollia perspicillata</i>  | 20.14   | 60      | Hosken et al 2001   | -  |      |
| <i>Cavia porcellus</i>         | 813     | 4100    | Gage et al 2002     | -  |      |
| <i>Cebus apella</i>            | 2600    | 9100    | Gage et al 2002     | -  |      |
| <i>Centurio senex</i>          | 22.85   | 40      | Hosken et al 2001   | -  |      |
| <i>Cercartetus concinnus</i>   | 14.3    | 60      | Rose et al 1997     | -  |      |
| <i>Cercocebus torquatus</i>    | 8680    | 25100   | Harcourt et al 1995 | LR | ?    |
| <i>Cercopithecus ascanius</i>  | 5360    | 3000    | Harcourt et al 1995 | -  |      |
| <i>Cervus elaphus</i>          | 122000  | 218000  | Gage et al 2002     | -  |      |
| <i>Chaerephon pumila</i>       | 10.48   | 50      | Hosken et al 2001   | -  |      |
| <i>Chalinobus gouldii</i>      | 14      | 14.5    | Gage et al 2002     | -  |      |
| <i>Cheirogaleus major</i>      | 340     | 2300    | Harcourt et al 1995 | -  |      |
| <i>Chinchilla lanigera</i>     | 422     | 5200    | Gage et al 2002     | VU | ?    |
| <i>Chiropodomys gliroides</i>  | 22      | 380     | Breed & Taylor 2000 | -  |      |
| <i>Chiruromys vates</i>        | 48      | 1744    | Breed & Taylor 2000 | -  |      |
| <i>Chlorocebus aethiops</i>    | 4950    | 13000   | Gage et al 2002     | -  |      |
| <i>Chrotopterus auritus</i>    | 78.6    | 90      | Hosken et al 2001   | -  |      |
| <i>Clethrionomys glareolus</i> | 218     | 646     | Gage et al 2002     | -  |      |
| <i>Coleura afra</i>            | 10.25   | 20      | Hosken et al 2001   | -  |      |
| <i>Colobus guereza</i>         | 10400   | 2980    | Harcourt et al 1995 | -  |      |
| <i>Colobus polykomos</i>       | 10250   | 10700   | Harcourt et al 1995 | LR | ?    |
| <i>Conilurus penicillatus</i>  | 184     | 4388    | Breed & Taylor 2000 | -  |      |
| <i>Connochaetes taurinus</i>   | 227000  | 306000  | Gage et al 2002     | LR | Down |
| <i>Cynopterus brachyotis</i>   | 31.5    | 120     | Hosken et al 2001   | -  |      |
| <i>Cynopterus sphinx</i>       | 37.19   | 180     | Hosken et al 2001   | -  |      |
| <i>Dama dama</i>               | 63700   | 133000  | Gage et al 2002     | -  |      |
| <i>Dasycercus byrnei</i>       | 118     | 540     | Rose et al 1997     | VU | Down |
| <i>Dasykaluta rosamondae</i>   | 35.3    | 130     | Rose et al 1997     | -  |      |
| <i>Dasymys incomtus</i>        | 242     | 3048    | Breed & Taylor 2000 | DD | -    |
| <i>Dasyurus hallucatus</i>     | 450     | 1350    | Rose et al 1997     | LR | Down |
| <i>Dasyurus viverrinus</i>     | 1500    | 3800    | Rose et al 1997     | LR | Down |
| <i>Desmodus rotundus</i>       | 32.71   | 40      | Hosken et al 2001   | -  |      |
| <i>Didelphis virginiana</i>    | 3000    | 3000    | Rose et al 1997     | -  |      |
| <i>Ectophylla alba</i>         | 5.36    | 40      | Hosken et al 2001   | LR | -    |
| <i>Eidolon helvum</i>          | 258.94  | 2830    | Hosken et al 2001   | -  |      |
| <i>Elephas maximus</i>         | 4545000 | 4000000 | Gage et al 2002     | EN | -    |
| <i>Eonycteris spelaea</i>      | 62      | 400     | Hosken et al 2001   | -  |      |
| <i>Epomophorus labiatus</i>    | 65.75   | 450     | Hosken et al 2001   | -  |      |
| <i>Epomops buettikoferi</i>    | 151.98  | 160     | Hosken et al 2001   | VU | Down |
| <i>Eptesicus furinalis</i>     | 7.53    | 60      | Hosken et al 2001   | -  |      |
| <i>Equus caballus</i>          | 450000  | 416000  | Gage et al 2002     | -  |      |
| <i>Equus grevyi</i>            | 386000  | 1150000 | Gage et al 2002     | EN | -    |
| <i>Erinaceus europaeus</i>     | 665     | 2310    | Gage et al 2002     | -  |      |
| <i>Erythrocebus patas</i>      | 10000   | 7200    | Gage et al 2002     | -  |      |

|                                  |         |         |                     |    |        |
|----------------------------------|---------|---------|---------------------|----|--------|
| <i>Eulemur fulvus</i>            | 2500    | 7780    | Harcourt et al 1995 | -  |        |
| <i>Eulemur macaco</i>            | 2500    | 16650   | Harcourt et al 1995 | VU | Down   |
| <i>Galago senegalensis</i>       | 220     | 1660    | Harcourt et al 1995 | -  |        |
| <i>Galagoides demidoff</i>       | 70      | 850     | Harcourt et al 1995 | -  |        |
| <i>Gazella dorcas</i>            | 72500   | 160000  | Gage et al 2002     | VU | Down   |
| <i>Giraffa camelopardalis</i>    | 1201000 | 1074000 | Gage et al 2002     | LR | Stable |
| <i>Glossophaga morenoi</i>       | 8.4     | 10      | Hosken et al 2001   | LR | -      |
| <i>Gorilla gorilla</i>           | 169000  | 29600   | Gage et al 2002     | EN | ?      |
| <i>Grammomys macmillani</i>      | 40      | 662     | Breed & Taylor 2000 | -  |        |
| <i>Gymnobelideus leadbeateri</i> | 130     | 130     | Rose et al 1997     | EN | Down   |
| <i>Haplonycteris fischeri</i>    | 18      | 410     | Hosken et al 2001   | VU | Down   |
| <i>Hippopotamus amphibius</i>    | 1600000 | 650000  | Gage et al 2002     | -  |        |
| <i>Hipposideros galeritus</i>    | 6.5     | 300     | Hosken et al 2001   | -  |        |
| <i>Hipposideros speoris</i>      | 10      | 40      | Hosken et al 2001   | -  |        |
| <i>Hydromys chrysogaster</i>     | 745     | 11795   | Breed & Taylor 2000 | -  |        |
| <i>Hylobates agilis</i>          | 6000    | 6320    | Harcourt et al 1995 | LR | ?      |
| <i>Hylobates lar</i>             | 5500    | 5500    | Gage et al 2002     | LR | ?      |
| <i>Hylobates moloch</i>          | 5440    | 6100    | Harcourt et al 1995 | CR | ?      |
| <i>Hyomys goliath</i>            | 1000    | 3751    | Breed & Taylor 2000 | -  |        |
| <i>Hypsignathus monstrosus</i>   | 354.4   | 240     | Hosken et al 2001   | -  |        |
| <i>Isodon macrourus</i>          | 1950    | 5390    | Rose et al 1997     | -  |        |
| <i>Isodon obesulus</i>           | 1115    | 4400    | Rose et al 1997     | -  |        |
| <i>Lagothrix lagotricha</i>      | 5220    | 11200   | Harcourt et al 1995 | -  |        |
| <i>Lasiorhinus latifrons</i>     | 31000   | 16140   | Rose et al 1997     | -  |        |
| <i>Lasiurus ega</i>              | 11.95   | 20      | Hosken et al 2001   | -  |        |
| <i>Lasiurus seminolus</i>        | 9.3     | 10      | Hosken et al 2001   | -  |        |
| <i>Lavia frons</i>               | 20.4    | 10      | Hosken et al 2001   | -  |        |
| <i>Leggadina forresti</i>        | 30      | 545     | Breed & Taylor 2000 | LR | ?      |
| <i>Leontopithecus rosalia</i>    | 550     | 1480    | Harcourt et al 1995 | CR | ?      |
| <i>Leopoldamys sabanus</i>       | 373     | 9035    | Breed & Taylor 2000 | -  |        |
| <i>Leporillus conditor</i>       | 187     | 4000    | Breed & Taylor 2000 | EN | ?      |
| <i>Leptomys elegans</i>          | 69      | 1240    | Breed & Taylor 2000 | CR | ?      |
| <i>Leptonycteris curasoae</i>    | 24.4    | 130     | Hosken et al 2001   | VU | Down   |
| <i>Lophocebus albigena</i>       | 10000   | 13780   | Harcourt et al 1995 | -  |        |
| <i>Lophuromys flavopunctatus</i> | 60      | 1138    | Breed & Taylor 2000 | -  |        |
| <i>Lorentzimys nouhuysi</i>      | 16      | 357     | Breed & Taylor 2000 | -  |        |
| <i>Loris tardigradus</i>         | 270     | 1800    | Harcourt et al 1995 | VU | ?      |
| <i>Loxodonta africana</i>        | 4365000 | 4530000 | Gage et al 2002     | EN | -      |
| <i>Macaca arctoides</i>          | 10510   | 48150   | Gage et al 2002     | VU | ?      |
| <i>Macaca fascicularis</i>       | 4420    | 35200   | Gage et al 2002     | LR | ?      |
| <i>Macaca mulatta</i>            | 9200    | 46200   | Gage et al 2002     | LR | ?      |
| <i>Macaca nemestrina</i>         | 9980    | 66700   | Gage et al 2002     | VU | ?      |
| <i>Macaca radiata</i>            | 8650    | 48200   | Harcourt et al 1995 | -  |        |
| <i>Macroderma gigas</i>          | 109     | 80      | Hosken et al 2001   | VU | Down   |
| <i>Macroglossus minimus</i>      | 15.13   | 140     | Hosken et al 2001   | -  |        |
| <i>Macroglossus sobrinus</i>     | 23      | 160     | Hosken et al 2001   | -  |        |
| <i>Macropus agilis</i>           | 11400   | 25640   | Rose et al 1997     | -  |        |
| <i>Macropus eugenii</i>          | 5850    | 31000   | Rose et al 1997     | -  |        |
| <i>Macropus fuliginosus</i>      | 34150   | 51620   | Rose et al 1997     | -  |        |

|                                |          |         |                     |    |   |
|--------------------------------|----------|---------|---------------------|----|---|
| <i>Macropus giganteus</i>      | 40720    | 42020   | Rose et al 1997     | -  |   |
| <i>Macropus robustus</i>       | 30000    | 40000   | Rose et al 1997     | -  |   |
| <i>Macropus rufogriseus</i>    | 18500    | 54570   | Rose et al 1997     | -  |   |
| <i>Macropus rufus</i>          | 45000    | 40000   | Rose et al 1997     | -  |   |
| <i>Macrotus waterhousii</i>    | 16       | 20      | Hosken et al 2001   | -  |   |
| <i>Mallomys rothschildi</i>    | 1087     | 14350   | Breed & Taylor 2000 | -  |   |
| <i>Mandrillus leucophaeus</i>  | 20000    | 41050   | Harcourt et al 1995 | EN | ? |
| <i>Mandrillus sphinx</i>       | 35000    | 68000   | Harcourt et al 1995 | VU | ? |
| <i>Mastomys coucha</i>         | 70       | 741     | Breed & Taylor 2000 | -  |   |
| <i>Mastomys natalensis</i>     | 59       | 972     | Breed & Taylor 2000 | -  |   |
| <i>Maxomys bartelsii</i>       | 93       | 4205    | Breed & Taylor 2000 | -  |   |
| <i>Maxomys surifer</i>         | 155      | 3328    | Breed & Taylor 2000 | -  |   |
| <i>Maxomys whiteheadi</i>      | 64       | 952     | Breed & Taylor 2000 | -  |   |
| <i>Mayermys ellermani</i>      | 18       | 539     | Breed & Taylor 2000 | VU | - |
| <i>Megaderma lyra</i>          | 64.04    | 80      | Hosken et al 2001   | -  |   |
| <i>Megaptera novaeangliae</i>  | 32658500 | 1729000 | Gage et al 2002     | VU | - |
| <i>Meles meles</i>             | 14515    | 14400   | Gage et al 2002     | -  |   |
| <i>Melomys burtoni</i>         | 78       | 1910    | Breed & Taylor 2000 | -  |   |
| <i>Melomys cervinipes</i>      | 139      | 2782    | Breed & Taylor 2000 | -  |   |
| <i>Melomys lanosus</i>         | 123      | 3004    | Breed & Taylor 2000 | -  |   |
| <i>Melomys leucogaster</i>     | 104      | 1102    | Breed & Taylor 2000 | -  |   |
| <i>Melomys platyops</i>        | 90       | 1670    | Breed & Taylor 2000 | -  |   |
| <i>Melomys rubex</i>           | 50       | 1872    | Breed & Taylor 2000 | -  |   |
| <i>Melomys rufescens</i>       | 68       | 1342    | Breed & Taylor 2000 | -  |   |
| <i>Mesembriomys gouldii</i>    | 545      | 5498    | Breed & Taylor 2000 | LR | - |
| <i>Mesembriomys macrurus</i>   | 341      | 8280    | Breed & Taylor 2000 | VU | - |
| <i>Mesocricetus auratus</i>    | 108      | 3170    | Gage et al 2002     | EN | - |
| <i>Microcebus murinus</i>      | 70       | 2490    | Harcourt et al 1995 | -  |   |
| <i>Micromys minutus</i>        | 7.8      | 178     | Gage et al 2002     | LR | - |
| <i>Micropteropus pusillus</i>  | 32.4     | 120     | Hosken et al 2001   | -  |   |
| <i>Microtus agrestis</i>       | 46.4     | 804     | Gage et al 2002     | -  |   |
| <i>Millardia meltada</i>       | 72       | 1078    | Breed & Taylor 2000 | -  |   |
| <i>Miniopterus australis</i>   | 7.9      | 20      | Hosken et al 2001   | -  |   |
| <i>Miniopterus minor</i>       | 7.01     | 30      | Hosken et al 2001   | LR | - |
| <i>Miniopterus schreibersi</i> | 10.78    | 40      | Hosken et al 2001   | LR | - |
| <i>Miopithecus talapoin</i>    | 1250     | 5200    | Harcourt et al 1995 | -  |   |
| <i>Monodelphis domestica</i>   | 70       | 280     | Rose et al 1997     | -  |   |
| <i>Monophyllus plethodon</i>   | 15.37    | 20      | Hosken et al 2001   | LR | - |
| <i>Mops condylurus</i>         | 32.98    | 70      | Hosken et al 2001   | -  |   |
| <i>Mormopterus planiceps</i>   | 9.5      | 90      | Hosken et al 2001   | -  |   |
| <i>Mus caroli</i>              | 15       | 108     | Breed & Taylor 2000 | -  |   |
| <i>Mus minutoides</i>          | 8        | 68      | Breed & Taylor 2000 | -  |   |
| <i>Mus musculus</i>            | 15.3     | 119     | Gage et al 2002     | -  |   |
| <i>Myotis adversus</i>         | 9.41     | 70      | Hosken et al 2001   | -  |   |
| <i>Myotis albescens</i>        | 5.6      | 180     | Hosken et al 2001   | -  |   |
| <i>Myotis bocagei</i>          | 7.8      | 40      | Hosken et al 2001   | -  |   |
| <i>Myotis lucifugus</i>        | 6.8      | 54.1    | Gage et al 2002     | -  |   |
| <i>Myotis nigricans</i>        | 4.36     | 10      | Hosken et al 2001   | -  |   |
| <i>Nasalis larvatus</i>        | 21550    | 13800   | Harcourt et al 1995 | EN | ? |



|                                  |       |        |                     |    |      |
|----------------------------------|-------|--------|---------------------|----|------|
| <i>Niviventer cremoriventer</i>  | 75    | 1222   | Breed & Taylor 2000 | -  |      |
| <i>Niviventer culturatus</i>     | 103   | 1876   | Breed & Taylor 2000 | LR | -    |
| <i>Noctilio albiventris</i>      | 30.37 | 30     | Hosken et al 2001   | -  |      |
| <i>Noctilio leporinus</i>        | 66.35 | 90     | Hosken et al 2001   | -  |      |
| <i>Notomys alexis</i>            | 34    | 50     | Gage et al 2002     | -  |      |
| <i>Notomys cervinus</i>          | 33    | 198    | Gage et al 2002     | LR | -    |
| <i>Notomys fuscus</i>            | 44    | 67     | Gage et al 2002     | VU | -    |
| <i>Notomys mitchellii</i>        | 39    | 62     | Gage et al 2002     | -  |      |
| <i>Nyctalus noctula</i>          | 28.5  | 270    | Hosken et al 2001   | -  |      |
| <i>Nyctophilus geoffroyi</i>     | 6.5   | 23     | Gage et al 2002     | -  |      |
| <i>Nyctophilus gouldi</i>        | 8     | 110    | Hosken et al 2001   | -  |      |
| <i>Nyctophilus timoriensis</i>   | 13.5  | 30     | Gage et al 2002     | VU | Down |
| <i>Odocoileus virginianus</i>    | 71000 | 76000  | Gage et al 2002     | -  |      |
| <i>Ondatra zibethicus</i>        | 1295  | 5060   | Gage et al 2002     | -  |      |
| <i>Ornithorhynchus anatinus</i>  | 1600  | 22150  | Rose et al 1997     | -  |      |
| <i>Oryctolagus cuniculus</i>     | 2880  | 6060   | Gage et al 2002     | -  |      |
| <i>Oryzomys palustris</i>        | 56    | 400    | Gage et al 2002     | -  |      |
| <i>Otomops martiensseni</i>      | 32.83 | 80     | Hosken et al 2001   | VU | Down |
| <i>Ovis aries</i>                | 35000 | 318800 | Gage et al 2002     | -  |      |
| <i>Pan troglodytes</i>           | 44340 | 118800 | Gage et al 2002     | EN | Down |
| <i>Papio hamadryas</i>           | 26400 | 93500  | Gage et al 2002     | LR | ?    |
| <i>Paruromys dominator</i>       | 342   | 1601   | Breed & Taylor 2000 | -  |      |
| <i>Pecari tajacu</i>             | 12300 | 11000  | Gage et al 2002     | -  |      |
| <i>Perameles nasuta</i>          | 1000  | 4000   | Rose et al 1997     | -  |      |
| <i>Peromyscus maniculatus</i>    | 19.5  | 393    | Gage et al 2002     | -  |      |
| <i>Petauroides volans</i>        | 1248  | 1580   | Rose et al 1997     | -  |      |
| <i>Petaurus breviceps</i>        | 136.3 | 140    | Rose et al 1997     | -  |      |
| <i>Phascolarctos cinereus</i>    | 11100 | 14960  | Rose et al 1997     | LR | ?    |
| <i>Philander opossum</i>         | 381   | 1500   | Rose et al 1997     | -  |      |
| <i>Phodopus sungorus</i>         | 42.4  | 930    | Gage et al 2002     | -  |      |
| <i>Phyllostomus discolor</i>     | 37.7  | 320    | Hosken et al 2001   | -  |      |
| <i>Phyllostomus hastatus</i>     | 96.98 | 150    | Hosken et al 2001   | -  |      |
| <i>Pipistrellus hesperus</i>     | 3.5   | 50     | Hosken et al 2001   | -  |      |
| <i>Pipistrellus kuhlii</i>       | 5.82  | 50     | Hosken et al 2001   | -  |      |
| <i>Pipistrellus mimus</i>        | 3.6   | 30     | Hosken et al 2001   | -  |      |
| <i>Pipistrellus nanus</i>        | 3.65  | 90     | Hosken et al 2001   | -  |      |
| <i>Pipistrellus pipistrellus</i> | 5.36  | 110    | Hosken et al 2001   | -  |      |
| <i>Pipistrellus rusticus</i>     | 4     | 160    | Hosken et al 2001   | -  |      |
| <i>Pipistrellus subflavus</i>    | 5     | 28.6   | Gage et al 2002     | -  |      |
| <i>Pithecia pithecia</i>         | 1600  | 920    | Harcourt et al 1995 | -  |      |
| <i>Plecotus auritus</i>          | 7.77  | 90     | Hosken et al 2001   | -  |      |
| <i>Plecotus rafinesquii</i>      | 9     | 377    | Gage et al 2002     | VU | Down |
| <i>Pogonomelomys sevia</i>       | 52    | 854    | Breed & Taylor 2000 | -  |      |
| <i>Pogonomys loriae</i>          | 105   | 3474   | Breed & Taylor 2000 | -  |      |
| <i>Pogonomys macrourus</i>       | 49    | 2462   | Breed & Taylor 2000 | -  |      |
| <i>Pongo pygmaeus</i>            | 74640 | 35300  | Gage et al 2002     | EN | ?    |
| <i>Potorous tridactylus</i>      | 1425  | 5600   | Rose et al 1997     | -  |      |
| <i>Praomys jacksoni</i>          | 40    | 888    | Breed & Taylor 2000 | DD | -    |
| <i>Presbytis rubicunda</i>       | 6230  | 3400   | Harcourt et al 1995 | -  |      |

|                                 |        |        |                     |    |      |
|---------------------------------|--------|--------|---------------------|----|------|
| Pseudantechinus macdonnellensis | 27.1   | 110    | Rose et al 1997     | -  |      |
| Pseudocheirus peregrinus        | 1030   | 4200   | Rose et al 1997     | -  |      |
| Pseudomys apodemoides           | 31     | 141    | Gage et al 2002     | -  |      |
| Pseudomys australis             | 59     | 2242   | Gage et al 2002     | VU | -    |
| Pseudomys delicatulus           | 9      | 43     | Gage et al 2002     | LR | -    |
| Pseudomys desertor              | 39     | 558    | Breed & Taylor 2000 | LR | -    |
| Pseudomys fuscus                | 117    | 3725   | Breed & Taylor 2000 | -  |      |
| Pseudomys gracilicaudatus       | 105    | 1084   | Gage et al 2002     | -  |      |
| Pseudomys hermannsburgensis     | 18     | 163    | Gage et al 2002     | -  |      |
| Pseudomys nanus                 | 78     | 1874   | Gage et al 2002     | LR | -    |
| Pseudomys novaehollandiae       | 19     | 71     | Gage et al 2002     | -  |      |
| Pseudomys pilligaensis          | 11     | 52     | Breed & Taylor 2000 | VU | -    |
| Pseudomys shortridgei           | 78     | 345    | Gage et al 2002     | LR | -    |
| Pteronotus davyi                | 8      | 90     | Hosken et al 2001   | -  |      |
| Pteropus alecto                 | 800    | 5100   | Gage et al 2002     | -  |      |
| Pteropus giganteus              | 881.33 | 4200   | Hosken et al 2001   | -  |      |
| Pteropus poliocephalus          | 677    | 6750   | Gage et al 2002     | -  |      |
| Pteropus scapulatus             | 400    | 5300   | Gage et al 2002     | -  |      |
| Pteropus tonganus               | 448    | 1900   | Hosken et al 2001   | -  |      |
| Rangifer tarandus               | 145000 | 132000 | Gage et al 2002     | -  |      |
| Rattus argentiventer            | 217    | 3051   | Breed & Taylor 2000 | -  |      |
| Rattus colletti                 | 154    | 1938   | Breed & Taylor 2000 | -  |      |
| Rattus exulans                  | 60     | 2600   | Gage et al 2002     | -  |      |
| Rattus fuscipes                 | 110    | 4262   | Breed & Taylor 2000 | -  |      |
| Rattus hoffmanni                | 140    | 2360   | Breed & Taylor 2000 | -  |      |
| Rattus leucopus                 | 170    | 4149   | Breed & Taylor 2000 | -  |      |
| Rattus losea                    | 110    | 2175   | Breed & Taylor 2000 | -  |      |
| Rattus lutreolus                | 163    | 4434   | Breed & Taylor 2000 | -  |      |
| Rattus norvegicus               | 500    | 4000   | Gage et al 2002     | -  |      |
| Rattus rattus                   | 169    | 7200   | Gage et al 2002     | -  |      |
| Rattus sordidus                 | 158    | 3522   | Breed & Taylor 2000 | LR | -    |
| Rattus steini                   | 93     | 1109   | Breed & Taylor 2000 | -  |      |
| Rattus tiomanicus               | 89     | 3473   | Breed & Taylor 2000 | -  |      |
| Rattus tunneyi                  | 243    | 4865   | Breed & Taylor 2000 | LR | -    |
| Rattus villosissimus            | 207    | 2150   | Breed & Taylor 2000 | -  |      |
| Rhabdomys pumilio               | 55     | 909    | Breed & Taylor 2000 | DD | -    |
| Rhinolophus clivosus            | 14.1   | 180    | Hosken et al 2001   | -  |      |
| Rhinolophus hipposideros        | 4.37   | 20     | Hosken et al 2001   | VU | Down |
| Rhinolophus megaphyllus         | 9.5    | 120    | Hosken et al 2001   | -  |      |
| Rhinopoma hardwickei            | 19     | 130    | Hosken et al 2001   | -  |      |
| Rhinopoma microphyllum          | 32.13  | 630    | Hosken et al 2001   | -  |      |
| Rhynchonycteris naso            | 4.24   | 10     | Hosken et al 2001   | -  |      |
| Rousettus aegyptiacus           | 151.23 | 1750   | Hosken et al 2001   | -  |      |
| Rousettus amplexicaudatus       | 83.43  | 370    | Hosken et al 2001   | -  |      |
| Saccolaimus peli                | 100    | 290    | Hosken et al 2001   | LR | -    |

|                                  |        |       |                     |    |        |
|----------------------------------|--------|-------|---------------------|----|--------|
| <i>Saguinus midas</i>            | 570    | 1830  | Harcourt et al 1995 | -  |        |
| <i>Saguinus nigricollis</i>      | 470    | 3800  | Harcourt et al 1995 | -  |        |
| <i>Saguinus oedipus</i>          | 520    | 3400  | Harcourt et al 1995 | EN | ?      |
| <i>Saimiri sciureus</i>          | 780    | 3200  | Gage et al 2002     | -  |        |
| <i>Sarcophilus lanarius</i>      | 9000   | 24120 | Rose et al 1997     | -  |        |
| <i>Scotophilus borbonicus</i>    | 22     | 140   | Hosken et al 2001   | CR | Down   |
| <i>Scotophilus heathi</i>        | 37.5   | 170   | Hosken et al 2001   | -  |        |
| <i>Semnopithecus entellus</i>    | 17000  | 11100 | Harcourt et al 1995 | LR | ?      |
| <i>Sigmodon hispidus</i>         | 223    | 1730  | Gage et al 2002     | -  |        |
| <i>Sminthopsis crassicaudata</i> | 15.5   | 50    | Rose et al 1997     | -  |        |
| <i>Sminthopsis macroura</i>      | 26     | 160   | Rose et al 1997     | -  |        |
| <i>Sminthopsis virginiae</i>     | 31     | 250   | Rose et al 1997     | -  |        |
| <i>Stenomys niobe</i>            | 49     | 1893  | Breed & Taylor 2000 | -  |        |
| <i>Sturnira bidens</i>           | 17.5   | 30    | Hosken et al 2001   | LR | -      |
| <i>Sturnira lilium</i>           | 19.85  | 60    | Hosken et al 2001   | -  |        |
| <i>Sundamys muelleri</i>         | 400    | 7440  | Breed & Taylor 2000 | -  |        |
| <i>Sus scrofa</i>                | 172000 | 36000 | Gage et al 2002     | -  |        |
| <i>Tachyglossus aculeatus</i>    | 4000   | 50000 | Rose et al 1997     | -  |        |
| <i>Tadarida aegyptiaca</i>       | 16.1   | 70    | Hosken et al 2001   | -  |        |
| <i>Tadarida brasiliensis</i>     | 12.8   | 50    | Hosken et al 2001   | LR | -      |
| <i>Taphozous georgianus</i>      | 30     | 40    | Hosken et al 2001   | -  |        |
| <i>Taphozous hildegardae</i>     | 31.75  | 70    | Hosken et al 2001   | VU | Down   |
| <i>Taphozous longimanus</i>      | 36     | 40    | Hosken et al 2001   | -  |        |
| <i>Tarsipes rostratus</i>        | 8.9    | 370   | Rose et al 1997     | -  |        |
| <i>Theropithecus gelada</i>      | 20400  | 17100 | Gage et al 2002     | LR | ?      |
| <i>Thylogale billardieri</i>     | 7958   | 46830 | Rose et al 1997     | -  |        |
| <i>Tokudaia osimensis</i>        | 89     | 213   | Breed & Taylor 2000 | EN | ?      |
| <i>Tonatia carrikeri</i>         | 23     | 200   | Hosken et al 2001   | VU | Down   |
| <i>Tragelaphus strepsiceros</i>  | 248000 | 92000 | Gage et al 2002     | LR | Stable |
| <i>Trichosurus vulpecula</i>     | 3350   | 8260  | Rose et al 1997     | -  |        |
| <i>Tylonycteris pachypus</i>     | 4.1    | 70    | Hosken et al 2001   | -  |        |
| <i>Tylonycteris robustula</i>    | 8.4    | 100   | Hosken et al 2001   | -  |        |
| <i>Uranomys ruddi</i>            | 40     | 348   | Breed & Taylor 2000 | -  |        |
| <i>Uroderma bilobatum</i>        | 18.45  | 50    | Hosken et al 2001   | -  |        |
| <i>Uromys anak</i>               | 879    | 11592 | Breed & Taylor 2000 | LR | -      |
| <i>Uromys caudimaculatus</i>     | 820    | 7197  | Breed & Taylor 2000 | -  |        |
| <i>Vampyroides caraccioli</i>    | 26.9   | 170   | Hosken et al 2001   | -  |        |
| <i>Vampyrus spectrum</i>         | 172.6  | 100   | Hosken et al 2001   | LR | -      |
| <i>Varecia variegata</i>         | 4750   | 17170 | Harcourt et al 1995 | EN | Down   |
| <i>Vombatus ursinus</i>          | 21300  | 27000 | Rose et al 1997     | -  |        |
| <i>Vulpes vulpes</i>             | 5069   | 9000  | Gage et al 2002     | -  |        |
| <i>Wallabia bicolor</i>          | 32000  | 16090 | Rose et al 1997     | -  |        |
| <i>Xenuromys barbatus</i>        | 950    | 18940 | Breed & Taylor 2000 | LR | -      |
| <i>Zaglossus bruijnii</i>        | 6920   | 81000 | Rose et al 1997     | EN | Down   |
| <i>Zyzomys argurus</i>           | 45     | 434   | Breed & Taylor 2000 | -  |        |

### Electronic Appendix C

Absolute values for male and female body mass were taken from Silva & Downing (1995). IUCN categories and population trend data were obtained from the IUCN Red List of Threatened Species™ (IUCN 2002). - = Not threatened; LR = Lower risk; VU = Vulnerable; EN = Endangered; CR = Critically endangered; EX = Extinct; DD = Data deficient (IUCN 1994). Population trend data, where known, were either Up, Down or Stable.

| Species                           | Male body mass (g) | Female body mass (g) | IUCN Category | Population Trend |
|-----------------------------------|--------------------|----------------------|---------------|------------------|
| <i>Acinonyx jubatus</i>           | 52750.00           | 44250.00             | VU            | Down             |
| <i>Acomys cahirinus</i>           | 31.00              | 40.50                | -             |                  |
| <i>Acomys cahirinus percivali</i> | 26.00              | 28.00                | -             |                  |
| <i>Acomys russatus</i>            | 59.60              | 65.40                | -             |                  |
| <i>Acomys spinosissimus</i>       | 25.57              | 25.43                | -             |                  |
| <i>Acomys subspinosus</i>         | 20.00              | 22.00                | -             |                  |
| <i>Acomys wilsoni</i>             | 17.00              | 20.00                | -             |                  |
| <i>Aconaemys fuscus</i>           | 133.00             | 134.00               | -             |                  |
| <i>Acrobates pygmaeus</i>         | 14.40              | 14.30                | -             |                  |
| <i>Aepyceros melampus</i>         | 55880.00           | 43660.00             | LR            | Stable           |
| <i>Aepyprymnus rufescens</i>      | 3000.00            | 3500.00              | -             |                  |
| <i>Aethomys chrysophilus</i>      | 82.00              | 73.26                | -             |                  |
| <i>Aethomys namaquensis</i>       | 49.85              | 46.95                | -             |                  |
| <i>Aethomys subspinosus</i>       | 20.30              | 23.20                | -             |                  |
| <i>Ailurus fulgens</i>            | 5400.00            | 5400.00              | EN            | ?                |
| <i>Akodon boliviensis</i>         | 33.00              | 25.75                | -             |                  |
| <i>Akodon cursor</i>              | 41.20              | 38.50                | -             |                  |
| <i>Akodon longipilis</i>          | 38.20              | 36.90                | -             |                  |
| <i>Akodon olivaceus</i>           | 28.20              | 25.80                | -             |                  |
| <i>Alcelaphus buselaphus</i>      | 151500.00          | 120000.00            | LR            | Down             |
| <i>Alces alces</i>                | 323000.00          | 257500.00            | -             |                  |
| <i>Allactaga elater</i>           | 63.50              | 51.50                | -             |                  |
| <i>Alouatta caraya</i>            | 7985.00            | 5390.00              | -             |                  |
| <i>Alouatta palliata</i>          | 8500.00            | 6400.00              | -             |                  |
| <i>Alouatta seniculus</i>         | 5620.00            | 4030.00              | -             |                  |
| <i>Amblysomus hottentotus</i>     | 71.00              | 64.80                | -             |                  |
| <i>Amblysomus julianae</i>        | 21.00              | 23.00                | CR            | ?                |
| <i>Ametrida centurio</i>          | 8.00               | 12.60                | -             |                  |
| <i>Ammodorcas clarkei</i>         | 30650.00           | 25450.00             | VU            | Down             |
| <i>Anisomys imitator</i>          | 508.00             | 512.00               | -             |                  |
| <i>Anoura caudifera</i>           | 11.00              | 10.00                | -             |                  |
| <i>Anoura cultrata</i>            | 20.40              | 15.00                | -             |                  |
| <i>Anoura geoffroyi</i>           | 15.48              | 14.13                | -             |                  |
| <i>Anoura latidens</i>            | 14.50              | 14.80                | LR            | -                |
| <i>Anourosorex squamipes</i>      | 19.00              | 19.70                | -             |                  |
| <i>Antechinus bellus</i>          | 55.00              | 34.00                | -             |                  |
| <i>Antechinus flavipes</i>        | 39.20              | 25.90                | -             |                  |
| <i>Antechinus godmani</i>         | 95.05              | 54.50                | LR            | Down             |

|                                   |             |             |    |        |
|-----------------------------------|-------------|-------------|----|--------|
| <i>Antechinus leo</i>             | 70.00       | 36.00       | LR | ?      |
| <i>Antechinus minimus</i>         | 65.00       | 42.00       | -  |        |
| <i>Antechinus naso</i>            | 54.00       | 42.80       | -  |        |
| <i>Antechinus stuartii</i>        | 39.13       | 25.63       | -  |        |
| <i>Antechinus swainsonii</i>      | 63.17       | 42.50       | -  |        |
| <i>Antidorcas marsupialis</i>     | 40950.00    | 37200.00    | LR | Stable |
| <i>Antilocapra americana</i>      | 51500.00    | 41000.00    | -  |        |
| <i>Antilope cervicapra</i>        | 38100.00    | 35300.00    | VU | -      |
| <i>Antrozous dubiaquercus</i>     | 22.30       | 29.00       | VU | Down   |
| <i>Antrozous pallidus</i>         | 18.70       | 28.50       | -  |        |
| <i>Aonyx capensis</i>             | 12750.00    | 12425.00    | -  |        |
| <i>Apodontia rufa</i>             | 1130.00     | 1070.00     | LR | ?      |
| <i>Apodemus agrarius</i>          | 22.25       | 21.50       | -  |        |
| <i>Apodemus draco</i>             | 23.60       | 20.90       | -  |        |
| <i>Apodemus flavicollis</i>       | 26.66       | 23.57       | -  |        |
| <i>Apodemus sylvaticus</i>        | 21.43       | 19.58       | -  |        |
| <i>Arctocephalus australis</i>    | 180000.00   | 60000.00    | -  |        |
| <i>Arctocephalus gazella</i>      | 158500.00   | 50000.00    | -  |        |
| <i>Arctocephalus pusillus</i>     | 233000.00   | 76400.00    | -  |        |
| <i>Arctocephalus tropicalis</i>   | 120500.00   | 43000.00    | -  |        |
| <i>Artibeus cinereus</i>          | 12.60       | 13.10       | -  |        |
| <i>Artibeus concolor</i>          | 18.20       | 20.00       | LR | -      |
| <i>Artibeus glaucus</i>           | 9.75        | 10.40       | -  |        |
| <i>Artibeus hartii</i>            | 17.40       | 17.30       | -  |        |
| <i>Artibeus hirsutus</i>          | 39.00       | 47.00       | VU | Down   |
| <i>Artibeus jamaicensis</i>       | 40.48       | 42.14       | -  |        |
| <i>Artibeus lituratus</i>         | 57.71       | 63.06       | -  |        |
| <i>Artibeus obscurus</i>          | 33.65       | 37.80       | -  |        |
| <i>Arvicantha niloticus</i>       | 74.00       | 64.50       | -  |        |
| <i>Arvicola terrestris</i>        | 311.00      | 272.00      | -  |        |
| <i>Asellia tridens</i>            | 25.20       | 22.40       | -  |        |
| <i>Atelerix frontalis</i>         | 332.00      | 317.60      | -  |        |
| <i>Atherurus africanus</i>        | 3430.00     | 3180.00     | -  |        |
| <i>Atilax paludinosus</i>         | 3400.00     | 3400.00     | -  |        |
| <i>Auliscomys micropus</i>        | 72.80       | 72.60       | -  |        |
| <i>Auliscomys pictus</i>          | 52.00       | 57.40       | -  |        |
| <i>Axis axis</i>                  | 77833.00    | 59133.00    | -  |        |
| <i>Axis porcinus</i>              | 42500.00    | 33500.00    | -  |        |
| <i>Balaena glacialis</i>          | 67200000.00 | 48900000.00 | -  |        |
| <i>Balaenoptera acutorostrata</i> | 6070000.00  | 6370000.00  | LR | -      |
| <i>Balantiopteryx io</i>          | 3.70        | 5.00        | LR | -      |
| <i>Bandicota bengalensis</i>      | 223.00      | 176.00      | -  |        |
| <i>Bandicota indica</i>           | 284.00      | 186.00      | -  |        |
| <i>Barbastella barbastellus</i>   | 8.90        | 10.00       | VU | Down   |
| <i>Bassariscus astutus</i>        | 1320.00     | 939.00      | -  |        |
| <i>Bathyergus suillus</i>         | 841.50      | 567.50      | -  |        |
| <i>Bdeogale crassicauda</i>       | 1930.00     | 1570.00     | -  |        |
| <i>Beamys hindei</i>              | 94.90       | 84.60       | VU | ?      |
| <i>Berylmys bowersi</i>           | 377.00      | 345.00      | -  |        |

|                            |            |            |    |      |
|----------------------------|------------|------------|----|------|
| Bison bison                | 730500.00  | 408750.00  | LR | -    |
| Blarina brevicauda         | 16.20      | 14.10      | -  |      |
| Blarina carolinensis       | 7.40       | 7.70       | -  |      |
| Bos primigenius            | 300000.00  | 280000.00  | -  |      |
| Boselaphus tragocamelus    | 270000.00  | 119000.00  | LR | -    |
| Bradypus tridactylus       | 3930.00    | 3770.00    | -  |      |
| Bradypus variegatus        | 4450.00    | 4220.00    | -  |      |
| Burramys parvus            | 44.90      | 41.85      | EN | Down |
| Caenolestes fuliginosus    | 30.15      | 21.48      | -  |      |
| Caenolestes inca           | 13.60      | 28.55      | -  |      |
| Calcochloris obtusirostris | 27.30      | 20.80      | -  |      |
| Callithrix jacchus         | 369.00     | 354.00     | -  |      |
| Callorhinus ursinus        | 177000.00  | 34500.00   | VU | ?    |
| Callosciurus erythraeus    | 350.00     | 370.00     | -  |      |
| Callosciurus notatus       | 230.00     | 190.00     | -  |      |
| Calomys callosus           | 48.90      | 41.00      | -  |      |
| Calomys musculinus         | 22.60      | 17.60      | -  |      |
| Calomys sorellus           | 21.50      | 16.00      | -  |      |
| Caloprymnus campestris     | 797.00     | 981.00     | EX | -    |
| Caluromys derbianus        | 328.00     | 270.00     | VU | Down |
| Caluromys philander        | 190.00     | 187.00     | LR | ?    |
| Canis adustus              | 8786.00    | 8320.00    | -  |      |
| Canis aureus               | 10300.00   | 8460.00    | -  |      |
| Canis latrans              | 14575.00   | 12212.50   | -  |      |
| Canis lupus                | 46400.00   | 39300.00   | -  |      |
| Canis lupus familiaris     | 15050.00   | 12450.00   | -  |      |
| Canis mesomelas            | 7802.80    | 7148.60    | -  |      |
| Canis rufus                | 27700.00   | 21600.00   | CR | ?    |
| Capra aegagrus             | 57766.00   | 36150.00   | VU | ?    |
| Capra cylindricornis       | 93500.00   | 50000.00   | VU | ?    |
| Capra ibex                 | 87400.00   | 53000.00   | -  |      |
| Capra sibirica             | 100000.00  | 60000.00   | -  |      |
| Capreolus capreolus        | 34066.00   | 31166.00   | -  |      |
| Capreolus pygargus         | 59000.00   | 52000.00   | -  |      |
| Capromys ingrahami         | 754.00     | 660.00     | -  |      |
| Caracal caracal            | 12500.00   | 9758.00    | -  |      |
| Cardioderma cor            | 26.20      | 23.40      | LR | -    |
| Carollia brevicauda        | 14.60      | 12.90      | -  |      |
| Carollia perspicillata     | 16.41      | 15.50      | -  |      |
| Casinycteris argyrris      | 26.00      | 28.50      | LR | ?    |
| Castor canadensis          | 24200.00   | 26300.00   | -  |      |
| Castor fiber               | 14900.00   | 13000.00   | LR | Up   |
| Cavia fulgida              | 285.00     | 280.00     | -  |      |
| Cebus apella               | 3370.00    | 2450.00    | -  |      |
| Cephalophus niger          | 22700.00   | 18100.00   | LR | Down |
| Cephalorhynchus commersoni | 65300.00   | 72400.00   | -  |      |
| Ceratotherium simum        | 2140000.00 | 1550000.00 | LR | Up   |
| Cercartetus caudatus       | 19.80      | 20.20      | -  |      |
| Cercartetus nanus          | 25.40      | 26.40      | -  |      |

|                                  |           |           |    |      |
|----------------------------------|-----------|-----------|----|------|
| <i>Cercocebus galeritus</i>      | 10200.00  | 5470.00   | LR | ?    |
| <i>Cercopithecus ascanius</i>    | 4000.00   | 3000.00   | -  |      |
| <i>Cercopithecus cephus</i>      | 4090.00   | 2880.00   | -  |      |
| <i>Cercopithecus mitis</i>       | 9310.00   | 4910.00   | -  |      |
| <i>Cercopithecus neglectus</i>   | 7000.00   | 3960.00   | -  |      |
| <i>Cercopithecus nictitans</i>   | 6600.00   | 4220.00   | -  |      |
| <i>Cercopithecus pogonias</i>    | 4500.00   | 3030.00   | -  |      |
| <i>Cervus elaphus</i>            | 160300.00 | 98733.00  | -  |      |
| <i>Cervus elaphus barbarus</i>   | 188000.00 | 125000.00 | LR | -    |
| <i>Cervus elaphus canadensis</i> | 289750.00 | 238000.00 | -  |      |
| <i>Cervus marianus</i>           | 192000.00 | 146000.00 | -  |      |
| <i>Cervus nippon</i>             | 39450.00  | 27550.00  | -  |      |
| <i>Cervus timorensis</i>         | 73000.00  | 53000.00  | -  |      |
| <i>Cervus unicolor</i>           | 222500.00 | 162000.00 | -  |      |
| <i>Chaerephon bivittata</i>      | 15.40     | 14.60     | -  |      |
| <i>Chaerephon major</i>          | 14.80     | 14.70     | -  |      |
| <i>Chaerephon pumila</i>         | 11.48     | 12.42     | -  |      |
| <i>Chalinolobus dwyeri</i>       | 8.50      | 9.86      | VU | Down |
| <i>Chalinolobus variegata</i>    | 11.65     | 12.00     | -  |      |
| <i>Chelemys macronyx</i>         | 74.60     | 72.00     | -  |      |
| <i>Chionomys nivalis</i>         | 39.70     | 40.50     | -  |      |
| <i>Chiroderma salvini</i>        | 24.95     | 24.30     | -  |      |
| <i>Chiroderma trinitatum</i>     | 13.10     | 14.00     | -  |      |
| <i>Chiroderma villosum</i>       | 21.00     | 22.90     | -  |      |
| <i>Chiropodomys gliroides</i>    | 24.90     | 25.70     | -  |      |
| <i>Chiropotes satanas</i>        | 3500.00   | 2500.00   | -  |      |
| <i>Chiruromys lamia</i>          | 48.00     | 47.00     | -  |      |
| <i>Chiruromys vates</i>          | 47.70     | 43.40     | -  |      |
| <i>Chlorocebus aethiops</i>      | 5532.00   | 4082.00   | -  |      |
| <i>Chlorotalpa arendsi</i>       | 58.20     | 46.50     | -  |      |
| <i>Choeroniscus godmani</i>      | 7.30      | 7.60      | LR | -    |
| <i>Choeroniscus intermedius</i>  | 4.60      | 8.30      | LR | -    |
| <i>Choeroniscus minor</i>        | 8.20      | 8.30      | -  |      |
| <i>Choloepus didactylus</i>      | 5250.00   | 5070.00   | -  |      |
| <i>Chroeomys jelskii</i>         | 35.50     | 33.50     | -  |      |
| <i>Chrotomys whiteheadi</i>      | 145.00    | 141.00    | VU | ?    |
| <i>Chrotopterus auritus</i>      | 65.10     | 68.90     | -  |      |
| <i>Chrysocyon brachyurus</i>     | 23800.00  | 22700.00  | LR | ?    |
| <i>Chrysospalax trevelyani</i>   | 420.00    | 433.00    | EN | ?    |
| <i>Chrysospalax villosus</i>     | 105.00    | 104.00    | VU | ?    |
| <i>Clethrionomys gapperi</i>     | 17.40     | 17.45     | -  |      |
| <i>Clethrionomys glareolus</i>   | 19.20     | 17.63     | -  |      |
| <i>Cloeotis percivali</i>        | 4.20      | 3.90      | LR | -    |
| <i>Coendou prehensilis</i>       | 4900.00   | 3050.00   | -  |      |
| <i>Coleura seychellensis</i>     | 10.20     | 11.10     | CR | Down |
| <i>Colobus polykomos</i>         | 10000.00  | 9670.00   | LR | ?    |
| <i>Colomys goslingi</i>          | 51.50     | 57.15     | -  |      |
| <i>Condylura cristata</i>        | 42.00     | 41.00     | -  |      |
| <i>Conepatus chinga</i>          | 2370.00   | 1465.00   | -  |      |

|                                  |           |           |    |      |
|----------------------------------|-----------|-----------|----|------|
| <i>Conepatus mesoleucus</i>      | 1890.00   | 2130.00   | -  |      |
| <i>Connochaetes taurinus</i>     | 210000.00 | 170500.00 | LR | Down |
| <i>Cormura brevirostris</i>      | 8.60      | 10.20     | -  |      |
| <i>Cricetomys gambianus</i>      | 1147.00   | 1121.00   | -  |      |
| <i>Cricetus cricetus</i>         | 316.00    | 211.00    | -  |      |
| <i>Crocidura cyanea</i>          | 8.80      | 9.40      | -  |      |
| <i>Crocidura flavescens</i>      | 31.05     | 27.90     | VU | ?    |
| <i>Crocidura fuscomurina</i>     | 5.03      | 4.73      | -  |      |
| <i>Crocidura hirta</i>           | 13.67     | 13.67     | -  |      |
| <i>Crocidura mariquensis</i>     | 13.45     | 9.70      | -  |      |
| <i>Crocidura occidentalis</i>    | 55.20     | 46.50     | -  |      |
| <i>Crocidura poensis</i>         | 12.00     | 11.25     | -  |      |
| <i>Crocidura silacea</i>         | 8.00      | 6.00      | -  |      |
| <i>Crocota crocata</i>           | 66000.00  | 67037.50  | LR | ?    |
| <i>Crunomys celebensis</i>       | 55.00     | 55.00     | EN | ?    |
| <i>Cryptomys damarensis</i>      | 105.67    | 95.00     | -  |      |
| <i>Cryptomys hottentotus</i>     | 95.95     | 73.99     | -  |      |
| <i>Cryptotis montivaga</i>       | 10.70     | 11.90     | -  |      |
| <i>Cryptotis parva</i>           | 4.65      | 5.95      | -  |      |
| <i>Ctenomys australis</i>        | 425.00    | 298.00    | -  |      |
| <i>Ctenomys boliviensis</i>      | 650.00    | 420.00    | -  |      |
| <i>Ctenomys fulvus</i>           | 210.00    | 314.00    | -  |      |
| <i>Ctenomys minutus</i>          | 79.00     | 105.00    | -  |      |
| <i>Ctenomys talarum</i>          | 147.67    | 113.67    | -  |      |
| <i>Cyclopes didactylus</i>       | 374.00    | 284.00    | -  |      |
| <i>Cynictis penicillata</i>      | 746.33    | 685.00    | -  |      |
| <i>Cynomys leucurus</i>          | 970.00    | 847.00    | -  |      |
| <i>Cynomys ludovicianus</i>      | 780.00    | 706.00    | LR | ?    |
| <i>Cynopterus sphinx</i>         | 343.00    | 394.00    | -  |      |
| <i>Cynopterus titthaecheilus</i> | 62.00     | 47.00     | -  |      |
| <i>Cystophora cristata</i>       | 400000.00 | 350000.00 | -  |      |
| <i>Dactylopsila palpator</i>     | 550.00    | 320.00    | -  |      |
| <i>Dactylopsila trivirgata</i>   | 448.00    | 360.00    | -  |      |
| <i>Dama dama</i>                 | 59166.00  | 46633.00  | -  |      |
| <i>Damaliscus lunatus</i>        | 134000.00 | 122000.00 | LR | Down |
| <i>Damaliscus pygargus</i>       | 70000.00  | 61000.00  | -  |      |
| <i>Dasycercus byrnei</i>         | 121.00    | 102.50    | VU | Down |
| <i>Dasycercus cristicaudata</i>  | 103.80    | 71.60     | VU | Down |
| <i>Dasykaluta rosamondae</i>     | 32.50     | 25.00     | -  |      |
| <i>Dasymys incomtus</i>          | 114.28    | 106.18    | -  |      |
| <i>Dasyprocta azarae</i>         | 2560.00   | 2060.00   | VU | Down |
| <i>Dasyprocta leporina</i>       | 3420.00   | 3830.00   | -  |      |
| <i>Dasypus novemcinctus</i>      | 6050.00   | 5380.00   | -  |      |
| <i>Dasyurus geoffroii</i>        | 1300.00   | 850.00    | VU | Down |
| <i>Dasyurus hallucatus</i>       | 525.00    | 525.00    | LR | Down |
| <i>Dasyurus maculatus</i>        | 7000.00   | 4000.00   | VU | Down |
| <i>Dasyurus viverrinus</i>       | 1300.00   | 880.00    | LR | Down |
| <i>Delphinapterus leucas</i>     | 947000.00 | 661000.00 | VU | -    |
| <i>Delphinus delphis</i>         | 59533.33  | 45433.33  | -  |      |



|                                    |           |           |    |      |
|------------------------------------|-----------|-----------|----|------|
| <i>Dendrolagus dorianus</i>        | 10400.00  | 8800.00   | VU | Down |
| <i>Dendrolagus goodfellowi</i>     | 6700.00   | 8150.00   | EN | Down |
| <i>Dendrolagus inustus</i>         | 12750.00  | 10000.00  | -  |      |
| <i>Dendrolagus lumholtzi</i>       | 7400.00   | 5900.00   | LR | -    |
| <i>Dendromus melanotis</i>         | 7.64      | 7.36      | -  |      |
| <i>Dendromus mesomelas</i>         | 12.00     | 10.60     | -  |      |
| <i>Dendromus mystacalis</i>        | 8.78      | 7.20      | -  |      |
| <i>Deomys ferrugineus</i>          | 54.10     | 49.50     | -  |      |
| <i>Desmodillus auricularis</i>     | 53.30     | 51.30     | -  |      |
| <i>Desmodus rotundus</i>           | 30.75     | 33.83     | -  |      |
| <i>Diaemus youngi</i>              | 36.40     | 37.50     | -  |      |
| <i>Diceros bicornis</i>            | 852000.00 | 884000.00 | CR | Up   |
| <i>Diclidurus albus</i>            | 14.90     | 16.30     | -  |      |
| <i>Diclidurus isabellus</i>        | 13.40     | 15.60     | LR | -    |
| <i>Diclidurus scutatus</i>         | 13.60     | 12.90     | -  |      |
| <i>Didelphis marupialis</i>        | 1709.67   | 1423.33   | -  |      |
| <i>Didelphis virginiana</i>        | 2407.50   | 1982.50   | -  |      |
| <i>Diphylla ecaudata</i>           | 25.70     | 25.70     | LR | -    |
| <i>Dipodomys ingens</i>            | 115.00    | 112.00    | CR | ?    |
| <i>Dipodomys merriami</i>          | 40.25     | 36.58     | -  |      |
| <i>Dipodomys microps</i>           | 17.00     | 18.35     | -  |      |
| <i>Distoechurus pennatus</i>       | 39.10     | 49.10     | -  |      |
| <i>Dobsonia minor</i>              | 70.00     | 84.20     | LR | -    |
| <i>Dobsonia moluccensis</i>        | 464.50    | 403.50    | -  |      |
| <i>Dorcopsis muelleri</i>          | 9130.00   | 3580.00   | -  |      |
| <i>Dorcopsulus vanheurni</i>       | 1500.00   | 1890.00   | -  |      |
| <i>Dremomys lokriah</i>            | 185.00    | 173.00    | -  |      |
| <i>Echymipera clara</i>            | 1490.00   | 983.00    | -  |      |
| <i>Echymipera kalubu</i>           | 1240.00   | 644.50    | -  |      |
| <i>Echymipera rufescens</i>        | 1220.00   | 871.00    | -  |      |
| <i>Eidolon helvum</i>              | 241.00    | 205.30    | -  |      |
| <i>Eira barbara</i>                | 4320.00   | 3500.00   | -  |      |
| <i>Elephantulus brachyrhynchus</i> | 45.40     | 44.33     | -  |      |
| <i>Elephantulus edwardii</i>       | 45.25     | 53.15     | VU | -    |
| <i>Elephantulus intufi</i>         | 46.45     | 51.95     | -  |      |
| <i>Elephantulus myurus</i>         | 53.93     | 54.68     | -  |      |
| <i>Elephantulus rufescens</i>      | 45.00     | 55.00     | -  |      |
| <i>Elephantulus rupestris</i>      | 62.80     | 70.00     | VU | -    |
| <i>Eliomys quercinus</i>           | 106.00    | 95.80     | VU | -    |
| <i>Emballonura beccarii</i>        | 4.10      | 4.30      | -  |      |
| <i>Emballonura raffrayana</i>      | 5.50      | 5.40      | LR | -    |
| <i>Enhydra lutris</i>              | 34500.00  | 19600.00  | EN | -    |
| <i>Eothenomys melanogaster</i>     | 18.30     | 20.30     | -  |      |
| <i>Epomophorus gambianus</i>       | 121.57    | 84.01     | -  |      |
| <i>Epomophorus labiatus</i>        | 77.08     | 66.05     | -  |      |
| <i>Epomophorus minor</i>           | 45.80     | 39.30     | -  |      |
| <i>Epomophorus wahlbergi</i>       | 92.00     | 77.00     | -  |      |
| <i>Epomops buettikoferi</i>        | 105.88    | 91.15     | VU | Down |
| <i>Epomops franqueti</i>           | 123.83    | 92.78     | -  |      |

|                                 |            |           |    |        |
|---------------------------------|------------|-----------|----|--------|
| <i>Eptesicus brasiliensis</i>   | 8.80       | 10.05     | -  |        |
| <i>Eptesicus furinalis</i>      | 7.60       | 7.25      | -  |        |
| <i>Eptesicus fuscus</i>         | 16.12      | 18.88     | -  |        |
| <i>Eptesicus rendalli</i>       | 6.00       | 6.50      | -  |        |
| <i>Eptesicus serotinus</i>      | 18.85      | 21.00     | -  |        |
| <i>Equus burchellii</i>         | 293000.00  | 276000.00 | -  |        |
| <i>Equus hemionus</i>           | 238000.00  | 204000.00 | VU | Down   |
| <i>Equus zebra</i>              | 283666.67  | 262000.00 | EN | -      |
| <i>Eremitalpa granti</i>        | 29.00      | 23.20     | VU | ?      |
| <i>Erinaceus europaeus</i>      | 999.67     | 823.67    | -  |        |
| <i>Erythrocebus patas</i>       | 9740.00    | 4800.00   | -  |        |
| <i>Eumops bonariensis</i>       | 7.40       | 7.00      | -  |        |
| <i>Eumops glaucinus</i>         | 32.45      | 31.30     | -  |        |
| <i>Eumops underwoodi</i>        | 56.80      | 57.30     | LR | -      |
| <i>Euneomys chinchilloides</i>  | 89.10      | 68.20     | -  |        |
| <i>Felis chaus</i>              | 8070.00    | 5050.00   | -  |        |
| <i>Felis margarita</i>          | 3125.00    | 2685.00   | LR | Down   |
| <i>Felis nigripes</i>           | 1500.00    | 1100.00   | VU | Down   |
| <i>Felis silvestris</i>         | 4200.00    | 2907.50   | -  |        |
| <i>Felis silvestris catus</i>   | 4320.00    | 3231.25   | -  |        |
| <i>Felis silvestris libyca</i>  | 4683.33    | 3860.00   | -  |        |
| <i>Feresa attenuata</i>         | 123000.00  | 114000.00 | -  |        |
| <i>Funambulus pennantii</i>     | 90.50      | 95.30     | -  |        |
| <i>Galago senegalensis</i>      | 158.20     | 154.60    | -  |        |
| <i>Galerella pulverulenta</i>   | 911.00     | 683.00    | -  |        |
| <i>Galerella sanguinea</i>      | 550.25     | 424.50    | -  |        |
| <i>Gazella subgutturosa</i>     | 25500.00   | 16500.00  | LR | -      |
| <i>Genetta genetta</i>          | 1874.00    | 1958.00   | -  |        |
| <i>Genetta tigrina</i>          | 2052.50    | 1905.00   | -  |        |
| <i>Geomys bursarius</i>         | 221.60     | 164.00    | -  |        |
| <i>Georychus capensis</i>       | 242.50     | 193.50    | -  |        |
| <i>Geoxus valdivianus</i>       | 31.30      | 31.70     | -  |        |
| <i>Gerbillurus pæba</i>         | 25.65      | 25.83     | -  |        |
| <i>Gerbillurus setzeri</i>      | 38.00      | 38.60     | -  |        |
| <i>Gerbillurus vallinus</i>     | 39.00      | 31.50     | -  |        |
| <i>Gerbillus campestris</i>     | 70.00      | 51.00     | -  |        |
| <i>Gerbillus gerbillus</i>      | 37.50      | 31.80     | -  |        |
| <i>Gerbillus gleadowi</i>       | 26.10      | 26.10     | -  |        |
| <i>Gerbillus nanus</i>          | 13.00      | 15.00     | -  |        |
| <i>Gerbillus pyramidum</i>      | 44.80      | 37.00     | -  |        |
| <i>Giraffa camelopardalis</i>   | 1190000.00 | 828000.00 | LR | Stable |
| <i>Glaucomys volans</i>         | 57.30      | 61.50     | -  |        |
| <i>Glis glis</i>                | 215.00     | 170.00    | LR | -      |
| <i>Glossophaga leachii</i>      | 10.10      | 10.10     | -  |        |
| <i>Glossophaga longirostris</i> | 12.18      | 12.13     | -  |        |
| <i>Glossophaga soricina</i>     | 8.70       | 9.30      | -  |        |
| <i>Gorilla gorilla</i>          | 204666.67  | 90000.00  | EN | ?      |
| <i>Gorilla gorilla graueri</i>  | 150000.00  | 80000.00  | EN | Down   |
| <i>Grammomys dolichurus</i>     | 30.45      | 30.80     | -  |        |

|                           |            |            |    |        |
|---------------------------|------------|------------|----|--------|
| Graphiurus hueti          | 65.00      | 54.00      | -  |        |
| Graphiurus murinus        | 24.10      | 21.03      | -  |        |
| Graphiurus platyops       | 38.36      | 43.10      | -  |        |
| Halichoerus grypus        | 233000.00  | 155000.00  | -  |        |
| Heliosciurus rufobrachium | 383.00     | 360.00     | -  |        |
| Helogale parvula          | 252.33     | 245.00     | -  |        |
| Herpestes edwardsii       | 1565.00    | 1008.00    | -  |        |
| Herpestes ichneumon       | 3263.33    | 2886.67    | -  |        |
| Herpestes javanicus       | 630.33     | 457.00     | -  |        |
| Heterohyrax brucei        | 2096.67    | 2456.67    | -  |        |
| Hippopotamus amphibius    | 1490000.00 | 1320000.00 | -  |        |
| Hipposideros caffer       | 8.35       | 8.10       | -  |        |
| Hipposideros cervinus     | 9.40       | 13.00      | -  |        |
| Hipposideros cineraceus   | 3.75       | 4.55       | -  |        |
| Hipposideros commersoni   | 95.65      | 102.35     | -  |        |
| Hipposideros diadema      | 47.75      | 44.15      | -  |        |
| Hipposideros lankadiva    | 44.00      | 38.50      | -  |        |
| Hipposideros semoni       | 7.50       | 1.38       | LR | -      |
| Hipposideros wollastoni   | 6.40       | 7.10       | LR | -      |
| Homo sapiens              | 71900.00   | 57200.00   | -  |        |
| Hyaena hyaena             | 39775.00   | 35150.00   | LR | ?      |
| Hybomys planifrons        | 46.50      | 52.70      | -  |        |
| Hybomys trivirgatus       | 52.00      | 49.60      | -  |        |
| Hybomys univittatus       | 55.80      | 53.60      | -  |        |
| Hydrochaeris hydrochaeris | 43100.00   | 42200.00   | -  |        |
| Hydromys chrysogaster     | 653.30     | 529.33     | -  |        |
| Hydropotes inermis        | 12550.00   | 13150.00   | LR | -      |
| Hyemoschus aquaticus      | 9700.00    | 12000.00   | -  |        |
| Hylobates agilis          | 6100.00    | 5650.00    | LR | ?      |
| Hylobates larvatus        | 5735.00    | 4850.00    | -  |        |
| Hylobates syndactylus     | 11450.00   | 10000.00   | -  |        |
| Hylomys suillus           | 56.00      | 64.00      | -  |        |
| Hylomyscus stella         | 19.10      | 16.70      | -  |        |
| Hyperoodon ampullatus     | 7500000.00 | 5800000.00 | LR | -      |
| Hypogeomys antimena       | 1200.00    | 1170.00    | EN | ?      |
| Hypsignathus monstrosus   | 333.00     | 230.00     | -  |        |
| Hypsiprymnodon moschatus  | 529.00     | 511.00     | -  |        |
| Hystrix africaeaustralis  | 13960.00   | 15680.00   | -  |        |
| Hystrix indica            | 16700.00   | 14650.00   | -  |        |
| Ichneumia albicauda       | 4440.00    | 4315.00    | -  |        |
| Ictonyx striatus          | 955.25     | 584.50     | -  |        |
| Irenomys tarsalis         | 44.40      | 41.90      | -  |        |
| Isodon macrourus          | 1500.00    | 1050.00    | -  |        |
| Jaculus jaculus           | 72.50      | 67.50      | -  |        |
| Jaculus orientalis        | 136.00     | 140.00     | LR | ?      |
| Kerivoula lanosa          | 6.00       | 7.00       | -  |        |
| Kerivoula muscina         | 5.20       | 5.10       | VU | ?      |
| Kobus leche               | 115000.00  | 86600.00   | LR | Stable |
| Kobus vardonii            | 73800.00   | 61200.00   | LR | Down   |

|                                   |            |            |    |      |
|-----------------------------------|------------|------------|----|------|
| <i>Lagenodelphis hosei</i>        | 209000.00  | 164000.00  | -  |      |
| <i>Lagorchestes hirsutus</i>      | 1580.00    | 1740.00    | VU | Down |
| <i>Lagostomus maximus</i>         | 5860.00    | 3410.00    | -  |      |
| <i>Lagothrix lagothricha</i>      | 6700.00    | 5900.00    | -  |      |
| <i>Lasionycteris noctivagans</i>  | 9.55       | 10.60      | -  |      |
| <i>Lasiorhinus krefftii</i>       | 30.10      | 32.50      | CR | Down |
| <i>Lasiurus borealis</i>          | 9.95       | 12.75      | -  |      |
| <i>Lasiurus castaneus</i>         | 12.30      | 17.00      | VU | ?    |
| <i>Lasiurus cinereus</i>          | 18.10      | 28.50      | -  |      |
| <i>Lasiurus ega</i>               | 11.90      | 13.50      | -  |      |
| <i>Lavia frons</i>                | 20.40      | 25.40      | -  |      |
| <i>Leggadina forresti</i>         | 15.10      | 11.50      | LR | ?    |
| <i>Lemniscomys griselda</i>       | 58.50      | 59.00      | -  |      |
| <i>Lemniscomys rosalia</i>        | 47.40      | 53.90      | -  |      |
| <i>Lemniscomys striatus</i>       | 38.07      | 39.50      | -  |      |
| <i>Leontopithecus rosalia</i>     | 445.00     | 570.00     | CR | ?    |
| <i>Leopardus pardalis</i>         | 13000.00   | 10800.00   | -  |      |
| <i>Leopoldamys edwardsi</i>       | 356.50     | 315.50     | -  |      |
| <i>Leopoldamys sabanus</i>        | 377.00     | 280.50     | -  |      |
| <i>Leptailurus serval</i>         | 10535.00   | 10642.50   | -  |      |
| <i>Leptomys elegans</i>           | 90.00      | 90.00      | LR | ?    |
| <i>Leptonychotes weddelli</i>     | 363000.00  | 376666.67  | -  |      |
| <i>Leptonycteris curasoae</i>     | 26.30      | 24.90      | VU | Down |
| <i>Leptonycteris yerbabuenae</i>  | 22.50      | 22.10      | -  |      |
| <i>Lepus americanus</i>           | 1380.00    | 1420.00    | -  |      |
| <i>Lepus californicus</i>         | 2250.00    | 2475.00    | -  |      |
| <i>Lepus capensis</i>             | 2144.00    | 2316.00    | -  |      |
| <i>Lepus capensis granatensis</i> | 2085.00    | 2230.00    | -  |      |
| <i>Lepus europaeus</i>            | 3230.00    | 3430.00    | -  |      |
| <i>Lepus nigricollis</i>          | 1840.00    | 2100.00    | -  |      |
| <i>Lepus saxatilis</i>            | 2290.00    | 2686.00    | -  |      |
| <i>Lepus timidus</i>              | 2700.00    | 3000.00    | -  |      |
| <i>Limnogale mergulus</i>         | 75.80      | 79.50      | EN | Down |
| <i>Lionycteris spurrelli</i>      | 8.70       | 8.90       | -  |      |
| <i>Lobodon carcinophagus</i>      | 220000.00  | 242000.00  | -  |      |
| <i>Lonchophylla robusta</i>       | 13.65      | 12.35      | -  |      |
| <i>Lonchophylla thomasi</i>       | 7.10       | 5.90       | -  |      |
| <i>Lonchorhina aurita</i>         | 14.30      | 15.10      | -  |      |
| <i>Lonchorhina orinocensis</i>    | 8.60       | 9.00       | LR | -    |
| <i>Lontra canadensis</i>          | 8100.00    | 6700.00    | -  |      |
| <i>Lontra longicaudis</i>         | 9250.00    | 3860.00    | -  |      |
| <i>Lophocebus albigena</i>        | 8980.00    | 6400.00    | -  |      |
| <i>Lophuromys melanonyx</i>       | 104.00     | 100.00     | LR | ?    |
| <i>Lophuromys sikapusi</i>        | 57.20      | 44.50      | -  |      |
| <i>Lorentzimys nouhuysii</i>      | 14.30      | 14.10      | -  |      |
| <i>Loxodonta africana</i>         | 2613333.33 | 2510000.00 | EN | -    |
| <i>Lutra lutra</i>                | 9600.00    | 6750.00    | VU | -    |
| <i>Lycaon pictus</i>              | 21800.00   | 22300.00   | EN | ?    |
| <i>Lynx canadensis</i>            | 10700.00   | 8590.00    | -  |      |

|                               |          |          |    |        |
|-------------------------------|----------|----------|----|--------|
| Lynx lynx                     | 17833.00 | 17766.00 | LR | Down   |
| Lynx pardinus                 | 12800.00 | 9300.00  | -  |        |
| Lynx rufus                    | 10907.50 | 7860.00  | -  |        |
| Macaca assamensis             | 6780.00  | 7450.00  | VU | Down   |
| Macaca fascicularis           | 5166.67  | 3083.33  | LR | ?      |
| Macaca fuscata                | 14550.00 | 12300.00 | -  |        |
| Macaca maura                  | 9450.00  | 5110.00  | EN | ?      |
| Macaca mulatta                | 7506.25  | 5675.00  | LR | ?      |
| Macaca nemestrina             | 10140.00 | 6370.00  | VU | ?      |
| Macaca nigra                  | 10600.00 | 6400.00  | EN | ?      |
| Macaca radiata                | 6500.00  | 3690.00  | -  |        |
| Macaca silenus                | 7810.00  | 4750.00  | EN | Down   |
| Macaca sinica                 | 6410.00  | 3405.00  | VU | Down   |
| Macaca thibetana              | 10700.00 | 7810.00  | LR | ?      |
| Macrogalidia musschenbroeckii | 6100.00  | 4200.00  | VU | ?      |
| Macroglossus minimus          | 16.80    | 18.10    | -  |        |
| Macrophyllum macrophyllum     | 7.10     | 7.20     | -  |        |
| Macropus agilis               | 19000.00 | 11000.00 | -  |        |
| Macropus antelopinus          | 37000.00 | 17500.00 | -  |        |
| Macropus bernardus            | 21000.00 | 13000.00 | LR | Stable |
| Macropus dorsalis             | 16000.00 | 6500.00  | -  |        |
| Macropus eugenii              | 7500.00  | 5500.00  | -  |        |
| Macropus fuliginosus          | 87133.00 | 38133.00 | -  |        |
| Macropus giganteus            | 33500.00 | 24000.00 | -  |        |
| Macropus parma                | 4895.00  | 3880.00  | LR | -      |
| Macropus parryi               | 16000.00 | 11000.00 | -  |        |
| Macropus robustus             | 40000.00 | 19000.00 | -  |        |
| Macropus rufogriseus          | 18825.00 | 12425.00 | -  |        |
| Macropus rufus                | 60300.00 | 26025.00 | -  |        |
| Macroscelides proboscideus    | 38.00    | 38.40    | VU | -      |
| Macrotis lagotis              | 1800.00  | 827.00   | VU | Down   |
| Macrotis leucura              | 397.50   | 311.00   | EX | -      |
| Macrotus californicus         | 11.10    | 10.80    | VU | Down   |
| Malacomys edwardsi            | 70.60    | 69.20    | -  |        |
| Malacomys longipes            | 75.50    | 69.00    | -  |        |
| Malacothrix typica            | 16.40    | 10.40    | -  |        |
| Mallomys rothschildi          | 1090.00  | 1230.00  | -  |        |
| Mandrillus sphinx             | 25000.00 | 11500.00 | VU | ?      |
| Manis crassicaudata           | 11300.00 | 9100.00  | LR | -      |
| Manis temminckii              | 10600.00 | 6690.00  | LR | -      |
| Manis tricuspis               | 1790.00  | 1480.00  | -  |        |
| Margaretamys beccarii         | 78.30    | 62.40    | -  |        |
| Margaretamys elegans          | 125.00   | 117.00   | VU | -      |
| Margaretamys parvus           | 34.60    | 29.60    | VU | -      |
| Marmosa incana                | 66.00    | 58.60    | -  |        |
| Marmota monax                 | 3850.00  | 3710.00  | -  |        |
| Martes martes                 | 1310.00  | 982.00   | -  |        |
| Martes pennanti               | 3300.00  | 1600.00  | -  |        |

|                                        |          |         |    |   |
|----------------------------------------|----------|---------|----|---|
| <i>Mastomys erythroleucus</i>          | 53.75    | 36.65   | -  |   |
| <i>Mastomys natalensis</i>             | 47.48    | 44.59   | -  |   |
| <i>Mastomys shortridgei</i>            | 45.00    | 48.00   | -  |   |
| <i>Maxomys rajah</i>                   | 145.00   | 156.00  | -  |   |
| <i>Maxomys surifer</i>                 | 177.00   | 170.00  | -  |   |
| <i>Maxomys whiteheadi</i>              | 52.10    | 51.80   | -  |   |
| <i>Megaloglossus woermanni</i>         | 15.40    | 15.20   | -  |   |
| <i>Melasmothrix naso</i>               | 50.80    | 44.10   | EN | - |
| <i>Meles meles</i>                     | 10120.00 | 8330.00 | -  |   |
| <i>Mellivora capensis</i>              | 8840.00  | 6025.00 | -  |   |
| <i>Melomys burtoni</i>                 | 57.50    | 47.50   | -  |   |
| <i>Melomys cervinipes</i>              | 76.60    | 71.30   | -  |   |
| <i>Melomys lanosus</i>                 | 122.00   | 115.00  | -  |   |
| <i>Melomys leucogaster</i>             | 121.00   | 96.00   | -  |   |
| <i>Melomys levipes</i>                 | 91.80    | 81.60   | -  |   |
| <i>Melomys monktoni</i>                | 101.00   | 89.80   | -  |   |
| <i>Melomys platyops</i>                | 84.70    | 69.10   | -  |   |
| <i>Melomys rattoides</i>               | 215.00   | 204.00  | -  |   |
| <i>Melomys rubex</i>                   | 50.30    | 45.90   | -  |   |
| <i>Melomys rufescens</i>               | 57.40    | 57.40   | -  |   |
| <i>Mephitis macroura</i>               | 806.00   | 717.00  | -  |   |
| <i>Mephitis mephitis</i>               | 2060.00  | 1730.00 | -  |   |
| <i>Meriones hurrianae</i>              | 83.10    | 70.00   | -  |   |
| <i>Mesembriomys gouldii</i>            | 677.00   | 579.00  | LR | - |
| <i>Mesophylla macconnelli</i>          | 6.40     | 6.60    | -  |   |
| <i>Metachirus nudicaudatus</i>         | 282.00   | 236.00  | -  |   |
| <i>Micoureus cinerea</i>               | 110.00   | 99.10   | -  |   |
| <i>Microdipodops megacephalus</i>      | 10.20    | 10.70   | -  |   |
| <i>Micronycteris brachyotis</i>        | 9.40     | 10.00   | -  |   |
| <i>Micronycteris hirsuta</i>           | 12.35    | 11.16   | -  |   |
| <i>Micronycteris megalotis</i>         | 5.38     | 6.20    | -  |   |
| <i>Micronycteris minuta</i>            | 6.80     | 6.65    | -  |   |
| <i>Micronycteris nicefori</i>          | 7.90     | 9.20    | -  |   |
| <i>Micronycteris schmidtorum</i>       | 7.60     | 7.00    | -  |   |
| <i>Micronycteris sylvestris</i>        | 7.30     | 10.30   | LR | - |
| <i>Microperoryctes longicauda</i>      | 478.00   | 598.00  | -  |   |
| <i>Micropotamogale ruwenzorii</i>      | 102.00   | 95.50   | EN | ? |
| <i>Microtus agrestis</i>               | 39.70    | 30.90   | -  |   |
| <i>Microtus arvalis</i>                | 42.00    | 36.00   | -  |   |
| <i>Microtus californicus</i>           | 96.20    | 63.20   | -  |   |
| <i>Microtus canicaudus</i>             | 31.10    | 25.80   | -  |   |
| <i>Microtus guentheri</i>              | 51.30    | 51.60   | LR | - |
| <i>Microtus montanus</i>               | 42.40    | 31.40   | -  |   |
| <i>Microtus oaxacensis</i>             | 43.20    | 37.60   | -  |   |
| <i>Microtus pennsylvanicus</i>         | 40.71    | 35.60   | -  |   |
| <i>Microtus pennsylvanicus breweri</i> | 49.60    | 44.60   | -  |   |
| <i>Microtus richardsoni</i>            | 106.00   | 91.00   | -  |   |
| <i>Microtus xanthognathus</i>          | 144.00   | 135.00  | -  |   |

|                           |            |           |    |      |
|---------------------------|------------|-----------|----|------|
| Millardia meltada         | 56.80      | 52.50     | -  |      |
| Mimon crenulatum          | 13.70      | 14.25     | -  |      |
| Miniopterus australis     | 8.30       | 7.60      | -  |      |
| Miniopterus magnater      | 13.60      | 13.60     | -  |      |
| Miniopterus pusillus      | 8.80       | 9.60      | -  |      |
| Miniopterus schreibersii  | 12.08      | 12.25     | LR | -    |
| Miniopterus tristis       | 14.20      | 14.20     | -  |      |
| Miopithecus talapoin      | 1380.00    | 1120.00   | -  |      |
| Mirounga leonina          | 3173333.33 | 625333.33 | -  |      |
| Molossops mattogrossensis | 7.50       | 7.20      | LR | -    |
| Molossops planirostris    | 13.60      | 11.65     | -  |      |
| Molossus ater             | 30.28      | 23.58     | -  |      |
| Molossus bondae           | 18.80      | 17.00     | -  |      |
| Molossus molossus         | 15.60      | 12.50     | LR | -    |
| Molossus molossus         | 12.54      | 11.74     | -  |      |
| Monodelphis domestica     | 122.50     | 90.00     | -  |      |
| Monodelphis emiliae       | 60.00      | 20.00     | VU | Down |
| Monophyllus plethodon     | 15.30      | 13.00     | LR | -    |
| Mops midas                | 43.75      | 41.75     | -  |      |
| Mormoops megalophylla     | 16.68      | 15.45     | -  |      |
| Mormopterus beccarii      | 14.00      | 17.00     | -  |      |
| Mormopterus petrophilus   | 12.80      | 15.00     | -  |      |
| Mosia nigrescens          | 3.10       | 3.40      | -  |      |
| Mungos mungo              | 1131.33    | 1242.00   | -  |      |
| Muntiacus muntjak         | 22000.00   | 15000.00  | -  |      |
| Muntiacus reevesi         | 14800.00   | 12200.00  | -  |      |
| Murexia longicaudata      | 211.00     | 68.00     | -  |      |
| Mus booduga               | 9.90       | 9.22      | -  |      |
| Mus indutus               | 5.40       | 6.90      | -  |      |
| Mus minutoides            | 6.34       | 6.74      | -  |      |
| Mus musculus              | 15.03      | 15.49     | -  |      |
| Mus platythrix            | 29.40      | 28.20     | -  |      |
| Mus setzeri               | 7.30       | 6.00      | -  |      |
| Mustela erminea           | 310.00     | 189.50    | -  |      |
| Mustela frenata           | 200.00     | 94.00     | -  |      |
| Mustela kathiah           | 359.00     | 201.00    | -  |      |
| Mustela nivalis           | 113.50     | 50.13     | -  |      |
| Mustela putorius          | 1180.00    | 719.50    | -  |      |
| Mustela putorius furo     | 1110.00    | 556.00    | -  |      |
| Mustela vison             | 1288.07    | 769.71    | -  |      |
| Myocastor coypus          | 7597.50    | 6050.00   | -  |      |
| Myomys daltoni            | 27.50      | 26.20     | -  |      |
| Myomys verreauxii         | 45.20      | 40.60     | -  |      |
| Myonycteris torquata      | 46.45      | 40.65     | -  |      |
| Myoprocta exilis          | 1200.00    | 1360.00   | -  |      |
| Myosorex cafer            | 12.15      | 12.95     | -  |      |
| Myosorex varius           | 12.10      | 11.00     | -  |      |
| Myotis albescens          | 5.60       | 5.70      | -  |      |
| Myotis austroriparius     | 6.50       | 7.20      | -  |      |

|                                 |           |          |    |        |
|---------------------------------|-----------|----------|----|--------|
| <i>Myotis bechsteinii</i>       | 7.60      | 8.50     | VU | Down   |
| <i>Myotis blythii</i>           | 21.90     | 24.50    | -  |        |
| <i>Myotis bocagii</i>           | 7.80      | 8.80     | -  |        |
| <i>Myotis capaccinii</i>        | 6.60      | 6.90     | VU | Down   |
| <i>Myotis daubentonii</i>       | 7.51      | 8.04     | -  |        |
| <i>Myotis emarginatus</i>       | 7.00      | 9.20     | VU | Down   |
| <i>Myotis grisescens</i>        | 10.10     | 10.88    | EN | Down   |
| <i>Myotis keaysi</i>            | 5.30      | 5.30     | -  |        |
| <i>Myotis keenii</i>            | 6.40      | 5.40     | -  |        |
| <i>Myotis lucifugus</i>         | 7.77      | 7.87     | -  |        |
| <i>Myotis myotis</i>            | 22.65     | 22.35    | LR | -      |
| <i>Myotis nattereri</i>         | 7.00      | 7.20     | -  |        |
| <i>Myotis nigricans</i>         | 4.00      | 3.80     | -  |        |
| <i>Myotis oxyotus</i>           | 5.40      | 5.60     | -  |        |
| <i>Myotis riparius</i>          | 4.30      | 4.40     | -  |        |
| <i>Myotis sodalis</i>           | 6.00      | 6.41     | EN | Down   |
| <i>Myotis tricolor</i>          | 12.40     | 11.70    | -  |        |
| <i>Myotis velifer</i>           | 9.90      | 7.90     | -  |        |
| <i>Myotis volans</i>            | 7.71      | 8.63     | -  |        |
| <i>Myrmecobius fasciatus</i>    | 495.00    | 416.00   | VU | ?      |
| <i>Mystacina tuberculata</i>    | 12.30     | 11.60    | VU | Down   |
| <i>Mystromys albicaudatus</i>   | 95.70     | 78.00    | VU | -      |
| <i>Nandinia binotata</i>        | 1990.00   | 1900.00  | -  |        |
| <i>Nanonycteris veldkampi</i>   | 19.70     | 23.00    | -  |        |
| <i>Napaeozapus insignis</i>     | 21.50     | 23.40    | -  |        |
| <i>Nasalis larvatus</i>         | 18825.00  | 9992.50  | EN | ?      |
| <i>Nasua nasua</i>              | 4275.00   | 3450.00  | -  |        |
| <i>Natalus tumidirostris</i>    | 6.78      | 5.88     | -  |        |
| <i>Nectomys squamipes</i>       | 176.00    | 205.50   | -  |        |
| <i>Neofelis nebulosa</i>        | 12000.00  | 9450.00  | VU | Down   |
| <i>Neohydromys fuscus</i>       | 19.50     | 18.00    | VU | -      |
| <i>Neomys anomalus</i>          | 73.60     | 76.00    | -  |        |
| <i>Neophoca cinerea</i>         | 300000.00 | 80000.00 | -  |        |
| <i>Neotoma albigula</i>         | 244.00    | 202.00   | -  |        |
| <i>Neotoma cinerea</i>          | 405.00    | 271.00   | -  |        |
| <i>Neotoma floridana</i>        | 272.67    | 237.67   | -  |        |
| <i>Neotoma lepida</i>           | 183.50    | 144.00   | -  |        |
| <i>Neotoma stephensi</i>        | 163.00    | 142.00   | -  |        |
| <i>Neotragus moschatus</i>      | 5000.00   | 5400.00  | LR | Stable |
| <i>Niviventer coninga</i>       | 79.30     | 57.00    | -  |        |
| <i>Niviventer cremoriventer</i> | 66.30     | 82.60    | -  |        |
| <i>Noctilio albiventris</i>     | 28.70     | 23.00    | -  |        |
| <i>Noctilio leporinus</i>       | 64.00     | 52.13    | -  |        |
| <i>Nyctalus lasiopterus</i>     | 45.20     | 59.80    | LR | -      |
| <i>Nyctalus noctula</i>         | 25.00     | 27.00    | -  |        |
| <i>Nycteris arge</i>            | 11.80     | 16.00    | -  |        |
| <i>Nycteris gambiensis</i>      | 6.50      | 7.40     | -  |        |
| <i>Nycteris macrotis</i>        | 13.90     | 13.60    | -  |        |
| <i>Nycteris thebaica</i>        | 10.15     | 11.10    | -  |        |



|                                  |            |           |    |      |
|----------------------------------|------------|-----------|----|------|
| Nycticebus coucang               | 920.00     | 900.00    | -  |      |
| Nycticeius humeralis             | 7.20       | 10.10     | -  |      |
| Nycticeius schlieffeni           | 4.75       | 5.10      | -  |      |
| Nyctimene aello                  | 82.60      | 92.30     | LR | -    |
| Nyctimene albiventer             | 29.70      | 32.00     | -  |      |
| Nyctinimops laticaudata          | 14.60      | 13.80     | -  |      |
| Nyctinimops laticaudata gracilis | 9.80       | 9.70      | -  |      |
| Nyctophilus arnhemensis          | 6.80       | 6.50      | -  |      |
| Nyctophilus bifax                | 8.74       | 9.49      | -  |      |
| Nyctophilus geoffroyi            | 5.59       | 6.44      | -  |      |
| Nyctophilus microtis             | 6.70       | 7.50      | -  |      |
| Nyctophilus walkeri              | 4.01       | 4.66      | LR | -    |
| Ochotona princeps                | 167.67     | 155.33    | -  |      |
| Ochotona roylei                  | 182.00     | 155.00    | -  |      |
| Ochrotomys nuttalli              | 22.55      | 22.20     | -  |      |
| Odobenus rosmarus                | 1270000.00 | 850000.00 | -  |      |
| Odocoileus hemionus              | 55400.00   | 43062.50  | -  |      |
| Odocoileus virginianus           | 76616.00   | 56416.00  | -  |      |
| Oenomys hypoxanthus              | 94.00      | 82.00     | -  |      |
| Ondatra zibethicus               | 1045.60    | 1028.80   | -  |      |
| Onychogalea fraenata             | 5500.00    | 4500.00   | EN | Down |
| Onychogalea unguifera            | 7500.00    | 5800.00   | -  |      |
| Onychomys leucogaster            | 31.35      | 24.50     | -  |      |
| Orcinus orca                     | 2730000.00 | 909000.00 | LR | -    |
| Oreamnos americanus              | 75000.00   | 70000.00  | -  |      |
| Oreotragus oreotragus            | 11243.00   | 12966.00  | LR | Down |
| Ornithorhynchus anatinus         | 1736.67    | 1267.67   | -  |      |
| Orycteropus afer                 | 53700.00   | 48850.00  | -  |      |
| Oryctolagus cuniculus            | 1515.00    | 1540.00   | -  |      |
| Oryx gazella                     | 217330.00  | 195000.00 | LR | -    |
| Oryx leucoryx                    | 92700.00   | 87700.00  | EN | -    |
| Oryzomys bicolor                 | 36.00      | 32.00     | -  |      |
| Oryzomys capito                  | 66.36      | 72.03     | -  |      |
| Oryzomys concolor                | 50.25      | 72.85     | -  |      |
| Oryzomys longicaudatus           | 37.70      | 27.80     | -  |      |
| Oryzomys nigripes                | 26.50      | 14.50     | -  |      |
| Oryzomys palustris               | 53.87      | 41.10     | -  |      |
| Oryzomys ratticeps               | 120.00     | 107.50    | -  |      |
| Otaria byronia                   | 300000.00  | 160000.00 | -  |      |
| Otocyon megalotis                | 4122.50    | 4247.50   | -  |      |
| Otolemur crassicaudatus          | 1245.00    | 935.00    | -  |      |
| Otomys angoniensis               | 119.27     | 132.73    | -  |      |
| Otomys irroratus                 | 122.00     | 114.00    | -  |      |
| Otomys laminatus                 | 190.00     | 110.00    | -  |      |
| Otomys maximus                   | 159.00     | 155.50    | -  |      |
| Otomys saundersiae               | 111.00     | 95.00     | LR | -    |
| Otomys sloggetti                 | 137.00     | 121.00    | LR | -    |
| Otomys unisulcatus               | 139.00     | 110.00    | -  |      |

|                                  |           |           |    |        |
|----------------------------------|-----------|-----------|----|--------|
| <i>Ourebia ourebi</i>            | 13200.00  | 15100.00  | LR | Down   |
| <i>Ovis aries</i>                | 66875.00  | 47500.00  | VU | Stable |
| <i>Ovis canadensis</i>           | 100000.00 | 60000.00  | LR | ?      |
| <i>Ovis nivicola</i>             | 93000.00  | 50500.00  | LR | Stable |
| <i>Oxymycterus hispidus</i>      | 36.50     | 37.00     | -  |        |
| <i>Oxymycterus roberti</i>       | 73.80     | 93.00     | -  |        |
| <i>Pan troglodytes</i>           | 49450.00  | 40300.00  | EN | Down   |
| <i>Panthera leo</i>              | 187333.33 | 139500.00 | VU | Down   |
| <i>Panthera pardus</i>           | 47050.00  | 27850.00  | -  |        |
| <i>Panthera tigris</i>           | 216000.00 | 134000.00 | EN | Down   |
| <i>Pantholops hodgsonii</i>      | 45500.00  | 27500.00  | EN | -      |
| <i>Papio anubis</i>              | 23900.00  | 12933.33  | -  |        |
| <i>Papio cynocephalus</i>        | 18600.00  | 11725.00  | -  |        |
| <i>Papio ursinus</i>             | 31050.00  | 15350.00  | -  |        |
| <i>Pappogeomys castanops</i>     | 261.50    | 242.00    | -  |        |
| <i>Paracynictis selousi</i>      | 1640.00   | 1640.00   | -  |        |
| <i>Parahyaena brunnea</i>        | 40583.33  | 38250.00  | LR | ?      |
| <i>Paraleptomys rufilatus</i>    | 54.00     | 58.00     | -  |        |
| <i>Parantechinus apicalis</i>    | 80.00     | 57.50     | EN | Down   |
| <i>Parantechinus bilarni</i>     | 28.00     | 23.00     | -  |        |
| <i>Paranyctimene raptor</i>      | 24.50     | 25.70     | LR | -      |
| <i>Paraxerus cepapi</i>          | 186.00    | 261.00    | -  |        |
| <i>Paraxerus palliatus</i>       | 284.00    | 295.00    | VU | ?      |
| <i>Paraxerus poensis</i>         | 115.00    | 134.00    | -  |        |
| <i>Parotomys brantsii</i>        | 138.00    | 121.00    | -  |        |
| <i>Pedetes capensis</i>          | 2968.33   | 3050.00   | VU | -      |
| <i>Pelomys fallax</i>            | 142.00    | 118.00    | -  |        |
| <i>Peromyscus attwateri</i>      | 26.80     | 29.00     | -  |        |
| <i>Peromyscus eremicus</i>       | 24.60     | 23.90     | -  |        |
| <i>Peromyscus gossypinus</i>     | 29.85     | 27.05     | -  |        |
| <i>Peromyscus leucopus</i>       | 21.46     | 21.34     | -  |        |
| <i>Peromyscus maniculatus</i>    | 20.20     | 19.84     | -  |        |
| <i>Peromyscus polionotus</i>     | 13.50     | 13.50     | -  |        |
| <i>Peropteryx kappleri</i>       | 7.70      | 8.50      | -  |        |
| <i>Peropteryx macrotis</i>       | 5.48      | 7.35      | -  |        |
| <i>Peropteryx trinitatis</i>     | 10.75     | 9.65      | -  |        |
| <i>Peroryctes raffrayana</i>     | 865.00    | 812.00    | -  |        |
| <i>Petaurista petaurista</i>     | 1260.00   | 1330.00   | -  |        |
| <i>Petaurus abidi</i>            | 328.00    | 228.00    | VU | ?      |
| <i>Petaurus australis</i>        | 582.00    | 528.00    | LR | -      |
| <i>Petaurus breviceps</i>        | 125.70    | 115.92    | -  |        |
| <i>Petrodromus tetradactylus</i> | 184.00    | 200.00    | -  |        |
| <i>Petromus typicus</i>          | 191.00    | 257.00    | -  |        |
| <i>Phacochoerus aethiopicus</i>  | 59475.00  | 45375.00  | -  |        |
| <i>Phalanger orientalis</i>      | 2500.00   | 2480.00   | -  |        |
| <i>Phalanger sericeus</i>        | 2040.00   | 1970.00   | -  |        |
| <i>Phalanger vestitus</i>        | 1770.00   | 1930.00   | VU | Down   |
| <i>Phascogale calura</i>         | 60.00     | 43.00     | EN | Down   |
| <i>Phascogale tapoatafa</i>      | 199.00    | 145.00    | LR | Down   |

|                                    |           |           |    |      |
|------------------------------------|-----------|-----------|----|------|
| <i>Phascolarctos cinereus</i>      | 7483.33   | 5683.33   | LR | ?    |
| <i>Phoca fasciata</i>              | 95000.00  | 75000.00  | -  |      |
| <i>Phoca hispida</i>               | 95600.00  | 92900.00  | -  |      |
| <i>Phoca vitulina</i>              | 123525.00 | 103200.00 | -  |      |
| <i>Phocoena phocoena</i>           | 48000.00  | 57000.00  | VU | -    |
| <i>Phocoena sinus</i>              | 46700.00  | 40000.00  | CR | -    |
| <i>Phyllostomus discolor</i>       | 34.83     | 32.48     | -  |      |
| <i>Phyllostomus elongatus</i>      | 41.10     | 40.10     | -  |      |
| <i>Phyllostomus hastatus</i>       | 90.80     | 82.15     | -  |      |
| <i>Phyllotis osilae</i>            | 53.75     | 39.75     | -  |      |
| <i>Pipistrellus bodenheimeri</i>   | 2.50      | 2.90      | LR | -    |
| <i>Pipistrellus capensis</i>       | 5.34      | 6.66      | -  |      |
| <i>Pipistrellus eisentrauti</i>    | 6.10      | 5.80      | -  |      |
| <i>Pipistrellus kuhlii</i>         | 4.90      | 5.97      | -  |      |
| <i>Pipistrellus nanus</i>          | 3.68      | 4.08      | -  |      |
| <i>Pipistrellus pipistrellus</i>   | 4.48      | 4.70      | -  |      |
| <i>Pipistrellus rusticus</i>       | 4.00      | 4.40      | -  |      |
| <i>Pipistrellus somalicus</i>      | 3.40      | 3.40      | -  |      |
| <i>Pipistrellus subflavus</i>      | 5.55      | 5.85      | -  |      |
| <i>Pithecheirus parvus</i>         | 102.00    | 104.00    | -  |      |
| <i>Pithecia pithecia</i>           | 1930.00   | 1510.00   | -  |      |
| <i>Planigale gilesi</i>            | 11.50     | 6.90      | -  |      |
| <i>Planigale ingrami</i>           | 4.20      | 4.30      | -  |      |
| <i>Planigale maculata</i>          | 12.00     | 10.00     | -  |      |
| <i>Planigale tenuirostris</i>      | 6.80      | 5.30      | -  |      |
| <i>Platyrrhinus aurarius</i>       | 33.60     | 34.70     | LR | -    |
| <i>Platyrrhinus helleri</i>        | 13.00     | 14.30     | -  |      |
| <i>Platyrrhinus umbratus</i>       | 23.40     | 25.60     | LR | -    |
| <i>Plecotus auritus</i>            | 7.37      | 7.30      | -  |      |
| <i>Plecotus austriacus</i>         | 6.50      | 6.70      | -  |      |
| <i>Plecotus rafinesquii</i>        | 9.20      | 8.10      | VU | Down |
| <i>Plecotus townsendii</i>         | 8.95      | 11.75     | VU | Down |
| <i>Poecilogale albinucha</i>       | 263.00    | 173.00    | -  |      |
| <i>Pogonomelomys ruemmleri</i>     | 33.40     | 26.00     | -  |      |
| <i>Pogonomys loriae</i>            | 94.40     | 96.40     | -  |      |
| <i>Pogonomys macrourus</i>         | 44.70     | 45.10     | -  |      |
| <i>Pogonomys sylvestris</i>        | 46.70     | 40.00     | -  |      |
| <i>Pongo pygmaeus</i>              | 74700.00  | 38500.00  | EN | ?    |
| <i>Potamochoerus porcus</i>        | 61700.00  | 59300.00  | -  |      |
| <i>Potorous longipes</i>           | 2100.00   | 1700.00   | EN | Down |
| <i>Potorous tridactylus</i>        | 1015.00   | 895.00    | -  |      |
| <i>Potos flavus</i>                | 1620.00   | 1650.00   | -  |      |
| <i>Praomys tullbergi</i>           | 38.30     | 35.45     | -  |      |
| <i>Praomys tullbergi lukolelae</i> | 51.40     | 40.00     | -  |      |
| <i>Presbytis obscura</i>           | 7650.00   | 6420.00   | -  |      |
| <i>Prionailurus bengalensis</i>    | 3300.00   | 2500.00   | -  |      |
| <i>Procapra gutturosa</i>          | 31500.00  | 24000.00  | LR | -    |
| <i>Procavia capensis</i>           | 3140.00   | 3047.50   | -  |      |
| <i>Procavia syriaca</i>            | 3510.00   | 3080.00   | -  |      |

|                                   |          |          |    |        |
|-----------------------------------|----------|----------|----|--------|
| <i>Procolobus badius</i>          | 11000.00 | 7000.00  | EN | ?      |
| <i>Procyon cancrivorus</i>        | 7630.00  | 6270.00  | -  |        |
| <i>Procyon lotor</i>              | 8508.00  | 6508.00  | -  |        |
| <i>Promops centralis</i>          | 14.40    | 15.80    | -  |        |
| <i>Pronolagus crassicaudatus</i>  | 2070.00  | 2390.00  | -  |        |
| <i>Pronolagus randensis</i>       | 2200.00  | 2470.00  | -  |        |
| <i>Pronolagus rupestris</i>       | 1000.00  | 1700.00  | -  |        |
| <i>Proteles cristatus</i>         | 8294.00  | 8806.00  | -  |        |
| <i>Protoxerus stangeri</i>        | 506.00   | 737.00   | -  |        |
| <i>Psammomys obesus</i>           | 92.10    | 69.10    | -  |        |
| <i>Pseudocheirus cupreus</i>      | 1770.00  | 1680.00  | -  |        |
| <i>Pseudocheirus forbesi</i>      | 732.00   | 566.00   | -  |        |
| <i>Pseudochirops albertisii</i>   | 875.00   | 860.00   | -  |        |
| <i>Pseudochirops mayeri</i>       | 149.00   | 155.00   | -  |        |
| <i>Pseudohydromys murinus</i>     | 16.20    | 17.40    | CR | -      |
| <i>Pteronotus davyi</i>           | 93.80    | 90.60    | -  |        |
| <i>Pteronotus gymnonotus</i>      | 12.60    | 14.00    | -  |        |
| <i>Pteronotus parnellii</i>       | 17.70    | 15.80    | -  |        |
| <i>Pteronotus personatus</i>      | 13.05    | 11.85    | -  |        |
| <i>Pteropus giganteus</i>         | 1450.00  | 900.00   | -  |        |
| <i>Pteropus neohibernicus</i>     | 995.00   | 1080.00  | -  |        |
| <i>Pteropus voeltzkowi</i>        | 540.00   | 515.00   | CR | Down   |
| <i>Puma concolor</i>              | 71750.00 | 42900.00 | -  |        |
| <i>Raphicerus campestris</i>      | 10800.00 | 11330.00 | -  |        |
| <i>Raphicerus melanotis</i>       | 10000.00 | 10500.00 | LR | Stable |
| <i>Raphicerus sharpei</i>         | 7000.00  | 7905.00  | LR | Stable |
| <i>Rattus annandalei</i>          | 279.00   | 322.00   | -  |        |
| <i>Rattus exulans</i>             | 55.08    | 50.34    | -  |        |
| <i>Rattus fuscipes</i>            | 115.00   | 100.00   | -  |        |
| <i>Rattus invelleri</i>           | 335.00   | 292.00   | -  |        |
| <i>Rattus leucopus</i>            | 211.00   | 212.00   | -  |        |
| <i>Rattus lutreolus</i>           | 130.00   | 120.00   | -  |        |
| <i>Rattus minutoides</i>          | 5.40     | 6.90     | -  |        |
| <i>Rattus niobe</i>               | 46.65    | 41.55    | -  |        |
| <i>Rattus norvegicus</i>          | 311.71   | 266.86   | -  |        |
| <i>Rattus novaeguinae</i>         | 137.00   | 129.00   | -  |        |
| <i>Rattus praetor</i>             | 155.50   | 139.35   | -  |        |
| <i>Rattus rattus</i>              | 133.10   | 129.45   | -  |        |
| <i>Rattus sordidus</i>            | 190.00   | 125.00   | LR | -      |
| <i>Rattus steini</i>              | 155.00   | 155.00   | -  |        |
| <i>Rattus verecundus</i>          | 63.40    | 55.40    | -  |        |
| <i>Rattus villosissimus</i>       | 156.00   | 112.00   | -  |        |
| <i>Ratufa macroura</i>            | 1295.00  | 1280.00  | VU | ?      |
| <i>Redunca arundinum</i>          | 50650.00 | 43650.00 | LR | Stable |
| <i>Redunca fulvorufula</i>        | 30200.00 | 28600.00 | LR | Down   |
| <i>Reithrodontomys fulvescens</i> | 11.50    | 11.33    | -  |        |
| <i>Reithrodontomys megalotis</i>  | 9.20     | 8.30     | -  |        |
| <i>Rhabdomys pumilio</i>          | 43.10    | 42.54    | -  |        |
| <i>Rhinolophus blasii</i>         | 6.27     | 5.03     | LR | -      |

|                           |           |           |    |      |
|---------------------------|-----------|-----------|----|------|
| Rhinolophus clivosus      | 16.20     | 17.00     | -  |      |
| Rhinolophus darlingi      | 8.35      | 9.00      | -  |      |
| Rhinolophus denti         | 5.70      | 6.60      | -  |      |
| Rhinolophus euryale       | 7.90      | 8.40      | LR | -    |
| Rhinolophus ferrumequinum | 18.42     | 18.40     | VU | Up   |
| Rhinolophus fumigatus     | 11.50     | 14.40     | -  |      |
| Rhinolophus hildebrandtii | 25.07     | 26.83     | -  |      |
| Rhinolophus hipposideros  | 4.55      | 4.30      | VU | Down |
| Rhinolophus mehelyi       | 12.65     | 12.30     | VU | Down |
| Rhinolophus rouxii        | 13.60     | 12.50     | -  |      |
| Rhinolophus simulator     | 8.00      | 9.20      | -  |      |
| Rhinophylla pumilio       | 9.40      | 10.40     | -  |      |
| Rhinopoma hardwickii      | 16.50     | 15.80     | -  |      |
| Rhogeessa minutilla       | 3.50      | 3.80      | LR | -    |
| Rhogeessa tumida          | 3.50      | 4.00      | -  |      |
| Rhynchogale melleri       | 2310.00   | 3070.00   | -  |      |
| Rhynchonycteris naso      | 3.75      | 2.60      | -  |      |
| Rousettus aegyptiacus     | 128.00    | 115.00    | -  |      |
| Rousettus amplexicaudatus | 91.80     | 85.70     | -  |      |
| Rousettus angolensis      | 59.60     | 66.05     | -  |      |
| Rousettus leschenaulti    | 85.00     | 75.00     | -  |      |
| Rupicapra rupicapra       | 40000.00  | 33500.00  | -  |      |
| Saccopteryx bilineata     | 7.45      | 8.13      | -  |      |
| Saccopteryx canescens     | 3.20      | 3.50      | -  |      |
| Saccopteryx leptura       | 4.38      | 5.08      | -  |      |
| Saccostomus campestris    | 51.33     | 46.47     | -  |      |
| Saccostomus mearnsi       | 46.50     | 44.50     | -  |      |
| Saguinus labiatus         | 460.00    | 455.00    | -  |      |
| Saguinus midas            | 391.33    | 413.67    | -  |      |
| Saguinus oedipus          | 393.50    | 333.00    | EN | ?    |
| Saguinus tripartitus      | 416.00    | 371.00    | -  |      |
| Saiga tatarica            | 41750.00  | 31150.00  | CR | Down |
| Saimiri boliviensis       | 480.00    | 750.00    | -  |      |
| Saimiri sciureus          | 953.00    | 540.00    | -  |      |
| Sarcophilus harrisii      | 8000.00   | 6000.00   | -  |      |
| Scalopus aquaticus        | 95.05     | 79.15     | -  |      |
| Sciurus aestuans          | 185.00    | 185.00    | -  |      |
| Sciurus carolinensis      | 889.00    | 486.00    | -  |      |
| Sciurus niger             | 754.00    | 720.00    | -  |      |
| Sciurus vulgaris          | 327.00    | 333.00    | LR | ?    |
| Scotonycteris ophiodon    | 67.00     | 68.00     | LR | Down |
| Scotonycteris zenkeri     | 20.40     | 21.15     | -  |      |
| Scotophilus dinganii      | 26.85     | 27.30     | -  |      |
| Scotophilus leucogaster   | 19.90     | 20.80     | -  |      |
| Scotophilus nigrita       | 23.00     | 26.30     | LR | -    |
| Semnopithecus entellus    | 19000.00  | 11175.00  | -  |      |
| Setonix brachyurus        | 3600.00   | 2900.00   | VU | Down |
| Sigmodon lichtensteinii   | 177000.00 | 166000.00 | -  |      |
| Sigmodon hispidus         | 100.00    | 86.64     | -  |      |

|                                      |          |          |    |      |
|--------------------------------------|----------|----------|----|------|
| <i>Sminthopsis crassicaudata</i>     | 16.63    | 13.83    | -  |      |
| <i>Sminthopsis hirtipes</i>          | 14.90    | 17.80    | -  |      |
| <i>Sminthopsis leucopus</i>          | 26.00    | 20.00    | -  |      |
| <i>Sminthopsis longicaudata</i>      | 17.50    | 17.50    | -  |      |
| <i>Sminthopsis murina</i>            | 22.00    | 19.00    | -  |      |
| <i>Sminthopsis ooldea</i>            | 11.00    | 11.00    | -  |      |
| <i>Sminthopsis psammophila</i>       | 35.65    | 30.25    | EN | Down |
| <i>Sminthopsis youngsoni</i>         | 9.90     | 10.30    | -  |      |
| <i>Sorex alpinus</i>                 | 6.35     | 6.08     | -  |      |
| <i>Sorex cinerus</i>                 | 4.23     | 4.38     | -  |      |
| <i>Sorex hoyi</i>                    | 2.80     | 2.35     | -  |      |
| <i>Sorex longirostris</i>            | 3.10     | 3.10     | -  |      |
| <i>Sorex merriami</i>                | 4.97     | 5.85     | -  |      |
| <i>Sorex ornatus</i>                 | 5.17     | 4.80     | -  |      |
| <i>Sorex palustris</i>               | 14.90    | 11.20    | -  |      |
| <i>Sorex saussurei</i>               | 4.30     | 5.00     | -  |      |
| <i>Sorex vagrans</i>                 | 4.42     | 4.43     | -  |      |
| <i>Sorex veraepacis</i>              | 9.00     | 6.00     | -  |      |
| <i>Soriculus fumidus</i>             | 6.72     | 6.74     | -  |      |
| <i>Sotalia fluviatilis</i>           | 54000.00 | 55000.00 | -  |      |
| <i>Spalacopus cyanus</i>             | 65.00    | 190.00   | -  |      |
| <i>Spermophilus citellus</i>         | 266.00   | 217.00   | VU | ?    |
| <i>Spermophilus franklinii</i>       | 379.00   | 347.00   | -  |      |
| <i>Spermophilus mollis</i>           | 154.00   | 121.00   | -  |      |
| <i>Spermophilus parryii</i>          | 791.00   | 699.00   | -  |      |
| <i>Spermophilus saturatus</i>        | 220.00   | 208.00   | -  |      |
| <i>Spermophilus tridecemlineatus</i> | 137.00   | 117.00   | -  |      |
| <i>Sphaerias blanfordi</i>           | 26.00    | 30.00    | -  |      |
| <i>Sphaeronycteris toxophyllum</i>   | 14.90    | 14.70    | -  |      |
| <i>Spilocuscus maculatus</i>         | 4570.00  | 3060.00  | -  |      |
| <i>Spilocuscus rufoniger</i>         | 5500.00  | 6500.00  | EN | Down |
| <i>Steatomys pratensis</i>           | 22.13    | 25.53    | -  |      |
| <i>Stenella attenuata</i>            | 60600.00 | 57400.00 | LR | -    |
| <i>Stenella coeruleoalba</i>         | 51000.00 | 57000.00 | LR | -    |
| <i>Stenella frontalis</i>            | 96500.00 | 83000.00 | -  |      |
| <i>Stochomys longicaudatus</i>       | 87.00    | 81.00    | -  |      |
| <i>Strigocuscus gymnotis</i>         | 3000.00  | 2410.00  | -  |      |
| <i>Sturnira aratathomasi</i>         | 48.30    | 56.70    | LR | -    |
| <i>Sturnira bidens</i>               | 17.20    | 16.30    | LR | -    |
| <i>Sturnira erythromos</i>           | 15.10    | 15.10    | -  |      |
| <i>Sturnira lilium</i>               | 20.60    | 17.03    | -  |      |
| <i>Sturnira ludovici</i>             | 26.80    | 24.00    | -  |      |
| <i>Sturnira tildae</i>               | 24.40    | 23.35    | -  |      |
| <i>Suncus etruscus</i>               | 1.81     | 2.19     | -  |      |
| <i>Suncus murinus</i>                | 54.68    | 35.58    | -  |      |
| <i>Sundamys muelleri</i>             | 300.00   | 334.00   | -  |      |
| <i>Sundasciurus tenuis</i>           | 93.50    | 77.70    | -  |      |
| <i>Suricata suricatta</i>            | 759.50   | 730.00   | -  |      |
| <i>Sus scrofa</i>                    | 96470.00 | 64580.00 | -  |      |

|                                |          |          |    |   |
|--------------------------------|----------|----------|----|---|
| <i>Syconycteris australis</i>  | 17.10    | 17.60    | -  |   |
| <i>Sylvicapra grimmia</i>      | 17900.00 | 19650.00 | -  |   |
| <i>Sylvilagus aquaticus</i>    | 2180.00  | 2067.50  | -  |   |
| <i>Sylvilagus audubonii</i>    | 725.00   | 860.00   | -  |   |
| <i>Sylvilagus bachmani</i>     | 619.50   | 667.00   | -  |   |
| <i>Sylvilagus floridanus</i>   | 1144.00  | 1212.00  | -  |   |
| <i>Sylvilagus palustris</i>    | 1780.00  | 1220.00  | -  |   |
| <i>Synaptomys cooperi</i>      | 30.85    | 33.00    | -  |   |
| <i>Tachyglossus aculeatus</i>  | 2875.00  | 3600.00  | -  |   |
| <i>Tadarida aegyptiaca</i>     | 15.77    | 16.27    | -  |   |
| <i>Tadarida australis</i>      | 24.70    | 27.50    | -  |   |
| <i>Tadarida brasiliensis</i>   | 13.35    | 12.20    | LR | - |
| <i>Tadarida condylura</i>      | 24.00    | 39.00    | -  |   |
| <i>Tadarida fulminans</i>      | 32.30    | 33.10    | LR | - |
| <i>Talpa europaea</i>          | 92.73    | 76.63    | -  |   |
| <i>Tamandua tetradactyla</i>   | 6000.00  | 5030.00  | -  |   |
| <i>Tamias amoenus</i>          | 48.40    | 55.70    | -  |   |
| <i>Tamias dorsalis</i>         | 67.80    | 74.90    | -  |   |
| <i>Tamias minimus</i>          | 40.40    | 68.70    | -  |   |
| <i>Tamias striatus</i>         | 98.00    | 104.00   | -  |   |
| <i>Tamias townsendii</i>       | 69.40    | 76.30    | -  |   |
| <i>Tamiasciurus hudsonicus</i> | 204.00   | 199.00   | -  |   |
| <i>Tamiasops maritimus</i>     | 67.70    | 73.30    | -  |   |
| <i>Tamiasops mccllellandii</i> | 45.00    | 53.00    | -  |   |
| <i>Taphozous mauritianus</i>   | 27.10    | 25.53    | -  |   |
| <i>Tarsipes rostratus</i>      | 8.50     | 10.00    | -  |   |
| <i>Tarsius syrichta</i>        | 95.50    | 104.00   | DD | - |
| <i>Tatera afra</i>             | 103.00   | 91.00    | -  |   |
| <i>Tatera brantsii</i>         | 87.18    | 85.18    | -  |   |
| <i>Tatera guineae</i>          | 103.00   | 102.00   | -  |   |
| <i>Tatera inclusa</i>          | 106.00   | 131.00   | -  |   |
| <i>Tatera indica</i>           | 156.17   | 135.42   | -  |   |
| <i>Tatera leucogaster</i>      | 68.07    | 64.43    | -  |   |
| <i>Tatera nigricauda</i>       | 132.00   | 114.00   | -  |   |
| <i>Tatera robusta</i>          | 108.00   | 84.00    | -  |   |
| <i>Tatera valida</i>           | 129.00   | 113.00   | -  |   |
| <i>Taxidea taxus</i>           | 7380.00  | 7000.00  | -  |   |
| <i>Tayassu tajacu</i>          | 20300.00 | 21900.00 | -  |   |
| <i>Thallomys paedulus</i>      | 79.23    | 75.90    | -  |   |
| <i>Theropithecus gelada</i>    | 20500.00 | 13600.00 | LR | ? |
| <i>Thomomys idahoensis</i>     | 62.20    | 59.25    | LR | ? |
| <i>Thomomys talpoides</i>      | 121.52   | 109.16   | -  |   |
| <i>Thomomys umbrinus</i>       | 187.50   | 144.50   | -  |   |
| <i>Thryonomys gregorianus</i>  | 1870.00  | 1880.00  | -  |   |
| <i>Thryonomys swinderianus</i> | 4478.00  | 3188.00  | -  |   |
| <i>Thylogale billardieri</i>   | 5662.50  | 4000.00  | -  |   |
| <i>Thylogale stigmatica</i>    | 5100.00  | 4200.00  | -  |   |
| <i>Thylogale thetis</i>        | 7000.00  | 3800.00  | -  |   |
| <i>Thyroptera tricolor</i>     | 4.70     | 4.50     | -  |   |

|                          |            |            |    |        |
|--------------------------|------------|------------|----|--------|
| Tonatia bidens           | 26.80      | 25.55      | -  |        |
| Tonatia brasiliense      | 9.90       | 9.03       | -  |        |
| Tonatia silvicola        | 30.60      | 24.00      | -  |        |
| Trachops cirrhosus       | 36.30      | 36.50      | -  |        |
| Trachypithecus phayrei   | 7300.00    | 6396.67    | -  |        |
| Tragelaphus angasii      | 109500.00  | 62000.00   | LR | Stable |
| Tragelaphus euryceros    | 405000.00  | 253000.00  | LR | Down   |
| Tragelaphus scriptus     | 41200.00   | 27000.00   | -  |        |
| Tragelaphus strepsiceros | 228000.00  | 157000.00  | LR | Stable |
| Trichechus inunguis      | 48100.00   | 19930.00   | VU | -      |
| Trichosurus arnhemensis  | 1600.00    | 1300.00    | -  |        |
| Trichosurus vulpecula    | 3250.00    | 2500.00    | -  |        |
| Tupaia glis              | 109.70     | 130.30     | -  |        |
| Tursiops truncatus       | 188000.00  | 117000.00  | -  |        |
| Uranomys ruddi           | 37.00      | 30.00      | -  |        |
| Urocyon cinereoargenteus | 4035.00    | 3632.50    | -  |        |
| Uroderma bilobatum       | 16.10      | 17.20      | -  |        |
| Uroderma magnirostrum    | 15.90      | 17.80      | -  |        |
| Uromys anak              | 879.00     | 450.00     | LR | -      |
| Uromys caudimaculatus    | 570.00     | 543.50     | -  |        |
| Ursus americanus         | 125000.00  | 128000.00  | -  |        |
| Ursus arctos             | 227000.00  | 182000.00  | -  |        |
| Ursus arctos horribilis  | 209500.00  | 100000.00  | -  |        |
| Ursus maritimus          | 505000.00  | 200000.00  | LR | Stable |
| Ursus thibetanus         | 85000.00   | 55000.00   | VU | ?      |
| Vampyressa bidens        | 11.00      | 12.20      | LR | -      |
| Vampyressa pumila        | 8.20       | 9.40       | -  |        |
| Vampyroides caraccioli   | 26.90      | 30.00      | -  |        |
| Vampyrum spectrum        | 164.75     | 184.00     | LR | -      |
| Viverra civetta          | 11900.00   | 11133.33   | -  |        |
| Volemys kikuchii         | 47.70      | 45.40      | -  |        |
| Vulpes chama             | 2826.60    | 2790.00    | -  |        |
| Vulpes vulpes            | 5301.67    | 4366.67    | -  |        |
| Wallabia bicolor         | 17000.00   | 13000.00   | -  |        |
| Xerus inauris            | 574.00     | 588.00     | -  |        |
| Zaglossus bruijnii       | 7000.00    | 8600.00    | EN | Down   |
| Zapus hudsonius          | 17.50      | 18.80      | -  |        |
| Zapus princeps           | 24.60      | 33.40      | -  |        |
| Zelotomys woosnami       | 53.70      | 54.50      | -  |        |
| Ziphius cavirostris      | 5600000.00 | 6500000.00 | -  |        |
| Zyzomys argurus          | 34.60      | 37.60      | -  |        |
| Zyzomys woodwardi        | 97.10      | 91.20      | -  |        |
